1 **Fine-scale seascape genomics of an exploited marine species, the common cockle**  
2 ***Cerastoderma edule*, using a multi-modelling approach**

3

4 Ilaria Coscia<sup>1\*</sup>, Sophie B. Wilmes<sup>2</sup>, Joseph E. Ironside<sup>3</sup>, Alice Goward-Brown<sup>2</sup>, Enda  
5 O’Dea<sup>4</sup>, Shelagh K. Malham<sup>2</sup>, Allan D. McDevitt<sup>1</sup>, Peter E. Robins<sup>2</sup>

6

7 **Running title:** Seascape genomics of the common cockle

8

9 **Keywords:** RADseq; Particle tracking; Irish Sea; redundancy analysis; population

10 connectivity; larval dispersal

11

12 **Addresses**

13 <sup>1</sup> Ecosystems and Environment Research Centre, School of Science, Engineering and  
14 Environment, University of Salford, Salford, M5 4WT, UK

15 <sup>2</sup> School of Ocean Sciences, Bangor University, Marine Centre Wales, Menai Bridge, LL59  
16 5AB.

17 <sup>3</sup> Institute of Biological, Environmental and Rural Sciences, Aberystwyth University,  
18 Penglais, Aberystwyth, Ceredigion, SY23 3DA, UK.

19 <sup>4</sup> Met Office, Fitzroy Road, Exeter, EX1 3PB, UK.

20

21 **Corresponding author:** I.Coscia@salford.ac.uk

22

23

24

25

26 **ABSTRACT**

27 Population dynamics of marine species that are sessile as adults are driven by oceanographic  
28 dispersal of larvae from spawning to nursery grounds. This is mediated by life-history traits  
29 such as the timing and frequency of spawning, larval behaviour and duration, and settlement  
30 success. Here, we use 1725 single nucleotide polymorphisms (SNPs) to study the fine scale  
31 spatial genetic structure in the commercially important cockle species *Cerastoderma edule*  
32 and compare it to environmental variables and current-mediated larval dispersal within a  
33 modelling framework. Hydrodynamic modelling employing the NEMO Atlantic Margin  
34 Model (AMM15) was used to simulate larval transport and estimate connectivity between  
35 populations during spawning months (April - September), factoring in larval duration and  
36 seasonal variability of ocean currents. Results at neutral loci reveal the existence of three  
37 separate genetic clusters (mean  $F_{ST}=0.021$ ) within a relatively fine spatial scale in the  
38 northwest Atlantic. Environmental association (EA) analysis indicates that oceanographic  
39 currents and geographical distance between the populations explain over 20% of the variance  
40 observed at neutral loci, while genetic variance (71%) at outlier loci was explained by sea  
41 surface temperatures extremes. These results fill an important knowledge gap in the  
42 management of a commercially important, overexploited species, and bring us closer to  
43 understanding the role of larval dispersal in connecting populations at a fine geographical  
44 scale.

45

46

47

48

49

50

## 51 **1. Introduction**

52 The assumption that genetic homogeneity predominates in marine organisms due to the lack  
53 of physical barriers and high dispersal potential at all life stages has been challenged in recent  
54 years (Allendorf, 2017). The advent of genomic markers generated by scanning the whole  
55 genome of an organism has equipped researchers with the necessary statistical power to detect  
56 more fine-scale population differentiation within the marine realm (Benestan et al., 2015;  
57 Maroso et al., 2018). Furthermore, genome scans have allowed a shift in focus from neutral  
58 variation to local adaptation, which is one of the main drivers of structure within marine  
59 populations (Araneda, Larraín, Hecht, & Narum, 2016; Nielsen et al., 2012; Woodings et al.,  
60 2018) and indicates the potential for resilience to future environmental change (Razgour et  
61 al., 2019). Connectivity between marine populations is central to their health and resilience to  
62 external pressures such as parasites and pathogens (Rowley et al., 2014), pollution, human  
63 exploitation and climate change over ecological and evolutionary timescales (Burgess,  
64 Bowring, & Shen, 2014; Cowen & Sponaugle, 2009; Gimenez, 2019). For these reasons, it is  
65 vital to distinguish between neutral variation and local adaptation when attempting to  
66 understand what drives the observed population structure in marine organisms.

67 A seascape genomics approach is particularly valuable in this context (Selkoe et al.,  
68 2016). Genetic and genomic data can be used in conjunction with environmental variables  
69 such as sea water temperature, salinity, water depth, irradiance, turbidity, and sediment type  
70 (Viricel & Rosel, 2014) against the neutral differentiation determined by the equilibrium  
71 between larval dispersal and effective population size (Coscia, Robins, Porter, Malham, &  
72 Ironside, 2013; Young et al., 2015). This can provide new insights for interpreting genetic  
73 patchiness in relation to specific environmental features (Benestan et al., 2016; Bernatchez et  
74 al., 2019; Truelove et al., 2017).

75           In particular, seascape genomics has proven to be extremely useful when considering  
76 exploited species, as it has the potential to inform management and aid sustainable  
77 exploitation by enabling management units to be defined (Bernatchez et al., 2017; Teacher,  
78 André, Jonsson, & Merilä, 2013). Despite intense exploitation of many marine species, their  
79 management rarely takes into account genomic information (Bernatchez et al., 2017; ICES,  
80 2018) and exploited aquatic invertebrates (shellfish) in particular receive little attention from  
81 policy makers and stakeholders in comparison with fish (Elliott & Holden, 2017). In the Irish  
82 Sea, shellfish represent 80% of the total landings per year, with an economic value of £46.6  
83 M (Elliott & Holden, 2017). Among these, the common cockle *Cerastoderma edule* fisheries  
84 are some of the most valuable fisheries for both Ireland and the United Kingdom (Dare, Bell,  
85 Walker, & Bannister, 2003; Hervas, Tully, Hickey, O’Keeffe, & Kelly, 2007) and are of high  
86 socio-economic importance, valued at £3.3 M for Wales alone (Elliott & Holden, 2017).

87           The common cockle has both ecological and commercial importance, providing an  
88 important food source for wading birds in addition to employment for coastal communities  
89 (Flach & de Bruin, 1994; Hickin, 2019). *C. edule* occurs in intertidal soft sediment regions of  
90 the eastern Atlantic, from Norway to Senegal. It can live for six to ten years and is  
91 characterized by high fecundity and high dispersal potential due to a pelagic larval phase  
92 which lasts for 24 to 35 days following spawning from May to August (Malham, Hutchinson,  
93 & Longshaw, 2012). In recent decades, cockle stocks have declined across Europe, with  
94 production falling from 108,000 tons in 1987 to less than 25,000 tons in 2008 (Martínez,  
95 Mendez, Insua, Arias-Pérez, & Freire, 2013). Cockle declines have been attributed to different  
96 factors in different locations, such as overharvesting (Wolff, 2005) and parasitic infections  
97 (Longshaw & Malham, 2015; Thieltges, 2006). In the UK, recurrent mass mortalities have  
98 occurred at several long-established cockle fisheries, resulting in significant economic losses  
99 (Woolmer, 2013). These mortalities have not been attributed to any single environmental

100 factor and interactions between multiple stress factors are suspected (Callaway, Burdon,  
101 Deasey, Mazik, & Elliott, 2013; Malham et al., 2012). Sustainable management of the  
102 common cockle is hindered by poor understanding of their population connectivity. Analysis  
103 of microsatellite and mitochondrial DNA markers suggests weak barriers to gene flow  
104 between *C. edule* populations along the North European coast (Coscia et al., 2013; Martínez,  
105 Freire, Arias-Pérez, Mendez, & Insua, 2015). However, these markers lack sufficient  
106 resolution to investigate connectivity at the finer scales relevant to fisheries management  
107 (Bernatchez et al., 2017).

108         Given the major logistical challenges of directly quantifying larval connectivity,  
109 efforts have focused on simulating ocean hydrodynamics to deduce larval dispersal  
110 probabilities (Cowen, Gawarkiewicz, Pineda, Thorrold, & Werner, 2007; Paris, Cowen, Claro,  
111 & Lindeman, 2005; Robins, Neill, Giménez, Jenkins, & Malham, 2013). This approach  
112 identifies well-connected population groups as well as weakly-connected, partially-connected  
113 or isolated populations. These simulations highlight the importance of local and mesoscale  
114 hydrodynamics interacting with species-specific larval behaviours in driving population  
115 persistence (Bode et al., 2019; Botsford et al., 2009; North et al., 2008; Robins et al., 2013)  
116 and recovery from stock decline (Gimenez, 2019), indicating that the capacity of a population  
117 to recover from mass mortalities is contingent on the scale of disturbance relative to the scale  
118 of connectivity. Usual circulation patterns and, hence connectivity, can be modulated by  
119 severe wind and wave conditions. Previous larval dispersal studies have predicted that given  
120 atypical meteorological conditions during spawning events, new connectivity routes can be  
121 established (e.g. by reversing the Celtic Sea front circulation; Hartnett, Berry, Tully, &  
122 Dabrowski, 2007), or by large distance displacements from expected routes affecting sea  
123 turtles: (Monzón-Argüello C. et al., 2012).

124 In the present study, a seascape genomics approach using single nucleotide  
125 polymorphisms (SNPs) is employed, for the first time, to resolve patterns of population  
126 structure of the common cockle between estuaries within a commercially active area (the Irish  
127 and Celtic Seas). An additional aim is to investigate the influence of environmental factors,  
128 including oceanic currents and water temperature upon the cockle's population structure. To  
129 do this, larval transport between sites is estimated and connectivity matrices are derived from  
130 oceanographic modelling, accounting for variability due to bio-physical parameters, i.e.  
131 spawning date and larval duration. Finally, Environmental Association analysis (EA) is used  
132 in order to understand the interplay between larval dispersal and abiotic factors in shaping the  
133 population connectivity measured with genomic markers.

134

## 135 **2. Materials and methods**

### 136 **2.1. Sampling and DNA extraction**

137 Cockles were collected between 2010 and 2011 from seven locations off the coasts of Ireland  
138 (Bannow Bay [BAN] and Flaxfort strand [FLX]) and Britain (Burry Inlet [BUR], Gann  
139 Estuary [GAN], Dyfi estuary [DYF], Red Wharf Bay [RWB] and Dee estuary [DEE]) (Fig. 1  
140 and Table 1). Genomic DNA was extracted from ethanol-preserved and frozen tissue using  
141 the DNeasy Blood and Tissue Kit with an additional RNaseA step (Qiagen©), as per the  
142 manufacturer's protocols. The quality and quantity of the extracted DNA was assessed by gel  
143 electrophoresis (1% agarose) as well as Qubit dsDNA HS (high sensitivity, 0.2 to 100 ng)  
144 Assay Kit on a Qubit 3.0 fluorometer according to the manufacturer's protocols.

145

### 146 **2.2 RAD sequencing and bioinformatic analysis**

147 Reduced representation libraries (Baird et al., 2008) were constructed using the restriction  
148 enzyme *PstI* (New England Biolabs) for Restriction-Site Associated DNA sequencing (RAD-

149 seq). RAD libraries (each consisting of 24 uniquely barcoded individuals) were produced  
150 according to Etter et al. (2011). Each library was quantified using real-time PCR and single-  
151 end (100bp target) sequenced on an *Illumina HiSeq2000* at Aberystwyth University, UK.  
152 Initial bioinformatic analysis, including quality control, demultiplexing and identification of  
153 polymorphisms were performed by *Florigenex* (Eugene, OR; [www.florigenex.com](http://www.florigenex.com)), using  
154 *Samtools* (Li et al., 2009) and custom scripts, retaining one SNP per tag, with a minimum  
155 coverage depth of six for each allele and genotyped in at least 70% of the individuals in the  
156 overall dataset. These settings produced an initial dataset of 191 individuals and 4271 single  
157 nucleotide polymorphisms (SNPs), which was then further filtered by the authors using the  
158 packages *poppr 2.8.1* (Kamvar, Brooks, & Grünwald, 2015; Kamvar et al., 2019; Kamvar,  
159 Tabima, & Grünwald, 2014), and *adegenet* (Jombart, 2008; Jombart & Ahmed, 2011; Jombart  
160 et al., 2018) in *R* (R Core Team, 2019).

161 In the second round of filtering, markers with data missing in more than 25% of  
162 individuals were discarded from the dataset. A second filtering step removed all loci with  $F_{IS}$   
163 equal to 1, -1 or NA. Three MAF (minimum allele frequency) filters of 0.05, 0.025 and 0.01  
164 were then applied, generating three datasets. No significant effect of MAF filter upon  
165 heterozygosity, global  $F_{ST}$  and population structure was detected, and so a MAF filter of 0.01  
166 across all sites was applied (Xuereb et al., 2018). This allowed us to maximize the number of  
167 markers and hence the information available at low spatial scale, while reducing the bias that  
168 might be introduced by retaining low frequency SNPs (Roesti, Salzburger, & Berner, 2012).  
169 All the downstream analyses were thus performed on the MAF=0.01 dataset. Markers in  
170 linkage disequilibrium (LD) were identified using the function *pair.ia* of the *poppr* package  
171 ( $r^2 > 0.7$ ). Finally, SNPs that were found to deviate from Hardy-Weinberg Equilibrium (HWE;  
172  $P=0.01$ ) in four out of seven populations were removed (Wyngaarden et al., 2018). The final,

173 filtered dataset included 138 individuals from the seven locations, and 1725 SNPs (Table 1  
174 Supplementary Material).

175

### 176 **2.3 Neutrality tests and population structure**

177 Genomic markers were tested for neutrality using two complementary methods: *BayeScan* 2.1  
178 (Foll & Gaggiotti, 2008) and the R package *pcadapt*. In order to minimize the detection of  
179 false positives, we considered as outliers only those SNPs that were selected by both methods  
180 (Coscia, Vogiatzi, Kotoulas, Tsigenopoulos, & Mariani, 2013). *BayeScan* is an  $F_{ST}$ -based,  
181 bayesian method (Beaumont & Balding, 2004), while *pcadapt* is based on a Principal  
182 Component Analysis (PCA) of individual genotypes and is known to perform particularly well  
183 in presence of weak structure, admixture or range expansions (Luu et al. 2017). To set the  
184 most appropriate number of clusters (K), we followed the recommendations of the authors  
185 and chose the K before the plateau in a scree plot, which displays in decreasing order the  
186 percentage of variance explained by each principal component (PC). Q-values were used to  
187 account for false discovery rate and SNPs were considered as significant outliers at alpha  
188 values  $\leq 0.05$ . Genetic diversity was estimated on three datasets: overall, neutral and outliers,  
189 in order to disentangle the role of demographic processes vs selection. Heterozygosity  
190 (expected and observed) was estimated with the R package *hierfstat* (Goudet, 2005; Goudet  
191 & Jombart, 2015), while population pairwise  $F_{ST}$  (Weir & Cockerham, 1984) and relative 95%  
192 confidence interval (1000 bootstraps) was estimated with the R package *assigner* (Gosselin,  
193 2019).

194 Individual-based population structure was assessed using two different approaches:  
195 discriminant analysis of principal components (DAPC) as implemented in *adegenet* (Jombart,  
196 2008; Jombart & Ahmed, 2011; Jombart et al., 2018) and *fastSTRUCTURE*, run with a simple  
197 prior (Raj, Stephens, & Pritchard, 2014), with the number of k clusters that best explains the



198 structure in the data chosen using the *chooseK.py* script within the *fastSTRUCTURE* software.  
199 The power of the neutral and outlier datasets to discriminate and assign individuals was  
200 determined with a genotype accumulation curve (Fig. 2 Supplementary Material), calculated  
201 with the function *genotype\_curve* of the *poppr* package (Kamvar et al., 2015, 2019, 2014).

202

## 203 **2.4 Hydrodynamic modelling**

204 Hydrodynamic modelling was used to simulate larval transport and predict connectivity  
205 between the seven sampled cockle populations, considering natural variability in larval  
206 dispersal caused by the timing of spawning relative to the tide, larval duration and seasonal  
207 variability of ocean currents. Simulated 3-D flow fields throughout the Irish and Celtic Seas  
208 during the cockle spawning/settlement season (April - September) were obtained from the  
209 NEMO Atlantic Margin Model (AMM15). The model has a horizontal resolution of 1.5 km  
210 and 51 terrain-following layers. It was developed to resolve key dynamical features of the  
211 European north-west shelf including the influence of shelf-break dynamics. Bathymetry was  
212 provided from EMODnet (EMODnet Portal, September 2015 release) and bottom friction was  
213 controlled through a log layer with a non-linear drag coefficient set at 0.0025. Ocean boundary  
214 conditions were taken from the Global Seasonal Forecast System (GLOSEA), which includes  
215 assimilation of both satellite and in-situ observations. Atmospheric forcing was driven by the  
216 European Centre for Medium-Range Weather Forecasts (ECMWF) atmospheric reanalysis  
217 product, ERA-Interim (Dee et al., 2011), while river inputs were based predominantly on daily  
218 climatology of gauge data. See Graham et al. (2018) for further details of the model  
219 development and validation. The simulated flows from AMM15 were used to drive a Particle  
220 Tracking Model (PTM) developed to simulate cockle larval transport from each sampled  
221 population. In particular, 3-D velocities during April-September were output at hourly-  
222 averaged temporal resolution.

223

## 224 **2.5 Particle Tracking Model (PTM)**

225 The PTM simulates the lagrangian movement of individual particles in space and time, based  
226 on oceanographic dispersion and individual particle behaviour. The PTM was programmed in  
227 Python and all simulations were run in a parallelised framework on high-performance  
228 computing. Hourly-averaged outputs of 3-D velocities from the ocean model was deemed  
229 practical in terms of data storage and PTM computational efficiency, whilst minimising  
230 uncertainties in particle dispersal generated from interpolating model output.

231 A previous sensitivity study by Robins et al. (2013) demonstrated that cohorts of  
232 10,000 particles released from a range of point sources within the Irish Sea were sufficient to  
233 statistically represent dispersal and connectivity patterns. Accordingly, cohorts of 750  
234 particles were released from sites 1-7 (Fig. 3) each day (at 12:00) over the initial 16 days of  
235 April 2014 (i.e. a total 12,000 particles per site covering a spring-neap tidal cycle). This  
236 procedure was repeated from April to September 2014. The dispersal of each particle was  
237 tracked for 40 days pelagic larval duration (PLD), reflecting the observed PLD of cockle  
238 larvae (Malham et al. 2012). Particles were neutrally buoyant and able to disperse throughout  
239 the 3-D flow field. Connectivity between populations was determined from particle  
240 trajectories during days 30-40; particles that travelled within 20 km of a settlement site were  
241 assumed to have settled there. The 20 km threshold was based on the average tidal excursion  
242 for the Irish Sea (Robins et al. 2013), although a range of thresholds are discussed in the  
243 Results section.

244

## 245 **2.6 Modelling uncertainty**

246 The ocean model AMM15 was run in free mode without data-assimilation. When its results  
247 were compared with a simulation with data-assimilation for a different year to this study, the

248 inherent biases were small and are not expected to change the advection along the tidal mixing  
249 fronts and hence larval transport. For the larval dispersal scenarios considered here, the  
250 simulated variability in dispersal distance after 40 days, due to the release day (particles were  
251 released daily for 16 days), was of the same order as the variability encountered within each  
252 daily cohort of particles. This result demonstrates the importance of ‘trickle-spawning’ larvae  
253 over a full lunar tidal cycle to capture dispersal variability.

254 In the absence of strong evidence for *C. edule* larval swimming behaviour, the effects  
255 of larval behaviour were not incorporated into the particle tracking model. The general  
256 agreement in population structure between our genomics and modelling analyses could be  
257 interpreted as evidence for a larval transport mechanism that is controlled by ocean dispersion  
258 rather than swimming behaviour. In effect, this result suggests that the ocean currents are  
259 much stronger than larval swimming speeds.

260 In this work, one year of larval dispersal was simulated. Due to interannual variations  
261 in weather patterns the timing of the onset of seasonal stratification and its strength can vary  
262 between years, variability in dispersal due to atmospheric conditions over one season has been  
263 accounted for in our study. As 2014 was an ‘average’ year with respect to the long-term  
264 current and stratification variability, we are confident that this year is representative of the  
265 mean transport pathways in the Irish and Celtic Sea region. However, future work could  
266 investigate the influence of interannual variations in ocean climate on larval dispersal. since,  
267 in the aftermath of severe storm events, ocean circulation patterns have been shown to reverse  
268 in UK shelf-seas (Stanev et al., 2019). Although such storms are rare, having only occurred  
269 around the UK four times in the last 40 years, changes in ocean circulation during spawning  
270 cycles due to rare and severe storms create additional uncertainty in larval trajectories,  
271 potentially leading to the establishment of new communities which have no clear connection  
272 at other times.

273           Despite the relatively fine spatial resolution of our model (1.5 km with 51 vertical  
274 layers), some coastal currents will inevitably be poorly resolved, adding a potential source of  
275 uncertainty for larval transport in the coastal zone. Coastal modelling requires an unstructured  
276 grid mapped onto a high-resolution coastal bathymetry and including wetting/drying  
277 capabilities within the model and also wave-induced currents. This is a considerable task in  
278 terms of validation and application to particle tracking, but should be considered for further  
279 studies.

280

## 281 **2.7 Spatial Eigenfunction Analysis (SEA) and Environmental Association (EA) analysis**

282 To test for association between the oceanographic environment and the cockle genetic  
283 structure, a Spatial Eigenfunction Analysis (SEA) (Dray et al., 2012) was performed. This  
284 approach was implemented through the *vegan* and *adespatial* packages (Dray et al., 2019;  
285 Oksanen et al., 2017) in R. SEA was used to estimate the influence of geographic distance  
286 between samples as well as the influence of modelled connectivity on genomic variation.

287 Geographic distance was represented as distance-based Moran's eigenvector maps or dbMEM  
288 (Stéphane Dray, Legendre, & Peres-Neto, 2006). dbMEMs were calculated using the *PCNM*  
289 function of the *vegan* package on the Euclidean distances (calculated with the function *dist*)  
290 in turn estimated from Cartesian-transformed coordinates using the *geoXY* function in the  
291 *SoDA* package (Chambers, 2013). *PCNM* transforms spatial distances in rectangular matrices  
292 that are suitable for constrained ordination (Legendre & Gallagher, 2001).

293           For the Environmental Association analysis (EA), modelled connectivity was  
294 represented as asymmetric eigenvector maps or AEM (Blanchet, Legendre, & Borcard, 2008;  
295 Blanchet, Legendre, Maranger, Monti, & Pepin, 2011). AEM is a spatial eigenfunction  
296 approach specifically developed to model multivariate responses to asymmetric and  
297 directional processes such as current-driven larval dispersal (Blanchet et al. 2011). The

298 connectivity probability matrix generated by the biophysical model was translated into a  
299 nodes-to-edge matrix which records the presence/absence of connectivity links (through  
300 *edges*, 19 here) between *nodes* (the 7 sampling locations). Each edge has an associated  
301 ‘weight’, based on the simulated probability of connectivity. AEMs were calculated with the  
302 *aem* function in R.

303 For each sampling location, the simulated monthly-averaged sea surface temperature  
304 (SST) and surface-bottom temperature difference (SBTD - the difference between the  
305 temperature at the surface and the bottom of the water column) representing ocean  
306 stratification, from April to September, were extracted from the ocean model (Figure 1  
307 Supplementary Material). The relative contribution of temperature (SST and SBTD), spatial  
308 distribution (dbMEMs) and directional connectivity (AEMs), to genetic variation in both the  
309 neutral and the outlier datasets (response variable) was modelled using redundancy analysis  
310 (RDA). In particular, the response variable was represented by population-specific minor  
311 allele frequencies (MAF) of each SNP calculated in the R package *hierfstat* (function  
312 *minorAllele*) (Goudet and Jombart 2015), detrended using the *decostand* function with the  
313 *hellinger* transformation available in *vegan* (Oksanen 2018). The most important explanatory  
314 variables were chosen by performing the forward selection with 10,000 permutations in *vegan*  
315 using the function *ordistep*. Each model’s significance was assessed with an analysis of  
316 variance (function *anova* in *vegan*) with 1000 permutations, to finally establish which factors  
317 were most correlated with genetic variation. Redundancy analysis (RDA) and partial-RDA  
318 (corrected for geographic distance between populations) were performed using the *rda*  
319 function in *vegan* on the putatively neutral (1711) and outlier (14) SNP datasets, and  
320 parsimonious RDAs were carried out using the variables selected (Borcard, Gillet, &  
321 Legendre, 2011).

322

### 323 3. RESULTS

#### 324 3.1 Genetic diversity and population structure

325 After filtering for missing data,  $F_{IS}$ , MAF, HWE and LD, 138 individuals and 1725 SNPs  
326 were retained (Table 1 Supplementary Material). *Bayescan* detected 28 SNPs as potential  
327 outliers, with a False Discovery Rate of 0.05, whereas *PCAdapt* found 62. Only 14 SNPs  
328 overlapped between the two approaches. The downstream analyses were then carried out on  
329 two datasets: neutral (1711 SNPs) and outliers (14 SNPs).

330 For the neutral dataset, expected and observed heterozygosity ( $H_E$  and  $H_O$ ) were  
331 similar across locations, ranging between 0.148-0.157 and 0.103-0.134, respectively (Table  
332 1). Pairwise  $F_{ST}$  (Fig. 3 and 4 Supplementary) ranged between 0 (RWB-DEE) and 0.0289  
333 (*GAN-DEE*). *fastSTRUCTURE*'s *choosek.py* detected three clusters ( $k=3$ ; Fig. 1D-G), while  
334 *DAPC*'s *find.clust* found a maximum of five clusters ( $k=5$ ; Fig. 1B-C) based on the BIC  
335 scores. For the putative outlier dataset,  $F_{ST}$  values ranged between 0 (DYF-GAN) and 0.38  
336 (BUR-FLX), but *choosek.py* and *DAPC*'s *find.clust* indicated that one cluster explained the  
337 structure in the data (barplots represented in Fig. 1E and 1G for comparison). All population-  
338 level neutral  $F_{IS}$  values were significant (95% confidence interval) and positive, ranging  
339 between 0.08 and 0.27 (Table 1). For the outlier dataset,  $H_E$  and  $H_O$  varied respectively  
340 between 0.21-0.35 and 0.14-0.28 and  $F_{IS}$  values were positive and significant for four  
341 populations: DEE, RWB, DYF and FLX.

342 Genotype accumulation curves (Fig. 2 Supplementary Material) for both datasets show  
343 that a plateau is reached and variance decreased at 20 neutral and 12 outliers loci respectively,  
344 indicating that the datasets have sufficient power to distinguish between individuals (Arnaud-  
345 Haond, Duarte, Alberto, & Serrão, 2007).

346

#### 347 3.2 Seasonal circulation and larval dispersal

348 The typical circulation structure within the Irish/Celtic Seas has, in our study, led to distinct  
349 patterns of larval transport and population connectivity, but with spatial variability over  
350 seasonal timescales. Whilst the tidal currents in the Irish Sea are characteristically large (e.g.  
351 peak flows exceed 1 m/s throughout much of the basin; Robins et al. 2015) and have the  
352 potential to advect larvae tens of kilometers during each tidal cycle, these currents are  
353 oscillatory, and resulting in small net flows and minimal dispersal over several weeks (Robins  
354 et al. 2013). However, the development of thermal stratification and ocean fronts during  
355 summer months generates density-driven currents along frontal boundaries (Horsburgh, Hill,  
356 & Brown, 1998; Simpson & Hunter, 1974). Although much weaker than tidal currents, these  
357 density-driven currents are persistent over time and act as key dispersal pathways for larvae.  
358 For example, the Celtic Sea front may facilitate connectivity of cockle populations from South  
359 Wales across to Ireland (Coscia et al. 2013).

360 The AMM15 simulation shows the Celtic and Irish Seas during April 2014 to be  
361 vertically well mixed with net tidal flows following well-known patterns due to tidal  
362 interactions with morphology (Pingree & Griffiths, 1979) (Fig. 2A). These net flows were  
363 generally less than 0.1 m/s and directed south/southwest and north/northeast from a parting  
364 zone (amphidromic point) south of Dublin. During May-September, the simulation shows the  
365 development of thermal stratification leading to density-driven currents (Fig. 2B-F). The  
366 Celtic Sea and the western Irish Sea stratified generating persistent east-to-west currents along  
367 the Celtic Sea front and an anti-clockwise gyre in the western Irish Sea. For the Celtic Sea  
368 front, depth-averaged flows were ~0.15 m/s but strongest at the thermocline at ~30m depth.  
369 These density-driven flows persisted but weakened during August and September.

370 The degree of exposure of the spawning grounds influenced the population's ability to  
371 connect with other sites (Figs. 3 and 5 Supplementary). This is shown by comparing the  
372 simulated particle dispersal from DEE (Site 1) with RWB (Site 2) on the north Wales coast.

373 The majority of particles dispersing from DEE remained <30 km from the release site,  
374 resulting in high proportion of self-recruitment ( $17.4\pm 0.7\%$ ), with only small proportions of  
375 particles dispersed north to the North Channel and the Scottish coast (Figs. 3A and 5  
376 Supplementary). In contrast, particles from RWB were exposed to stronger currents and the  
377 site experienced a lower degree of self-recruitment ( $13.6\pm 3.5\%$ ) with ‘hot-spots’ of higher  
378 density particles (up to 0.5%) advected ~100 km northwards (Figs. 3B).

379 Our simulations suggest a high degree of isolation at DYF (Site 3) (Figs. 3C and 5  
380 Supplementary), with the majority of particles retained within Cardigan Bay. Due to the weak  
381 flows within Cardigan Bay, simulated particles from other sites did not reach DYF within the  
382 40-day larval stage. Simulated particles from GAN (Site 4) and BUR (Site 5) were capable of  
383 dispersing readily between one another (up to 1% connectivity) and also westwards to the  
384 Irish populations, particularly from the more exposed GAN (up to 0.5% connectivity) (Figs.  
385 3D-E and 5 Supplementary). Connectivity with DEE was possible but unlikely (<0.01%). It  
386 was clear from the simulations that seasonal patterns of dispersal are expected, e.g. from BAN  
387 (Site 6) and FLX (Site 7) (Figs. 3F-G and 5 Supplementary). Simulated dispersal from these  
388 populations was controlled by the persistent westward residuals around southern Ireland, with  
389 the particles generally travelling further west as the residuals strengthened during summer  
390 months. For the BAN population, only during April when the Celtic front had not formed,  
391 were particles able to disperse northwards into the Irish Sea.

392

393

### 394 **3.5 Environmental Association analysis**

395 The *ordistep* function found that three variables were linked to the population structure found  
396 at neutral loci: July SBTD explained 10% of the genetic variance ( $P=0.002$ ,  $\text{adj}R^2=0.10$ ),



397 dbMEM-1 7% ( $P=0.000$ ,  $\text{adj}R^2=0.07$ ) and AEM2 4 %( $P=0.050$ ,  $\text{adj}R^2=0.04$ ). Partial RDAs  
398 on neutral data using these three variables were not significant.

399 For the outlier dataset, two environmental factors were found to be highly significant  
400 by *ordistep*, explaining 71% of the genetic variance: April min SST ( $P=0.025$ ,  $\text{adj}R^2=0.71$ )  
401 and September min SST ( $P=0.004$ ,  $\text{adj}R^2=0.71$ ). These SST values were the lowest daily mean  
402 SST in each month. The global parsimonious RDA (Fig. 4A) was overall non-significant when  
403 including the three selected factors at once ( $P=0.11$ ), although it was significant when  
404 including two at a time: dbMEM-1+July mean SBTD ( $P=0.008$ ), AEM2 + dbMEM-1  
405 ( $P=0.022$ ). Partial RDAs were not significant. The parsimonious RDA run on outliers was  
406 globally highly significant ( $P=0.002$ ; Fig. 4B).

407 For the neutral RDA, the first axis explained almost 48% of the total variance, and was  
408 mainly driven by dbMEM-1 geographic distance between sites. This axis separates the  
409 northern sites of Red Wharf Bay, Dee Estuary and Dyfi Estuary from the southern sites of  
410 Flaxfort Strand, Bannow Bay, Gann Estuary and Burry Inlet, describing a north-south divide  
411 that is not connected by oceanic currents. The second axis (RDA2) was influenced  
412 predominantly by an asymmetrical eigenvector representing modelled connectivity (AEM2)  
413 and July sea surface-bottom temperature difference (July mean SBTD), a key determinant of  
414 ocean stratification. On this axis, the southernmost population Flaxfort Strand (light green) is  
415 strongly related to AEM2, the asymmetrical eigenvector that represents larval dispersal (Fig.  
416 4A). Redundancy analysis carried out on the outliers dataset revealed patterns of local  
417 adaptation, with cool sea surface temperatures being the most significant driver (Fig. 4B).

418

#### 419 **4. Discussion**

420 This is the first study to use genomic markers and biophysical larval transport modelling to  
421 investigate the drivers of connectivity in a commercially important shellfish in north-western

422 Europe. This research was conducted in the Irish and Celtic Seas where *C. edule* forms  
423 valuable shellfisheries for both Ireland and the United Kingdom. A panel of 1725 SNP  
424 markers was analysed in relation to important environmental variables such as temperature  
425 and oceanographic currents, factors that have been shown to be drivers of population structure  
426 in bivalves (Araneda et al., 2016; Gormley et al., 2015; Bernatchez et al., 2019; Lehnert et al.,  
427 2019; Xuereb et al., 2018). Using genomic markers, three main genetic groups were identified,  
428 which can be considered stocks or management units. Overall, the genetic results fit well with  
429 the predictions of the larval transport model, providing a level of empirical validation for both  
430 the simulated hydrodynamics and larval behavioural traits. Environmental association  
431 analysis revealed that neutral genetic structure was strongly linked to geographical distance  
432 between sites and to the strength and direction of the ocean currents acting as corridors for  
433 larval dispersal, whereas colder periods (cold SSTs) were identified as the drivers of local  
434 adaptation.

435

436

#### 437 **4.1 Connectivity, fine-scale population structure and local adaptation**

438 Neutral genetic diversity was very low across the study area, and compared with previous  
439 studies on marine bivalve population genomics (Bernatchez et al., 2019, Lehnert et al., 2019).  
440 Populations of cockles in the Irish Sea have been under pressure for at least two decades, with  
441 mass mortality events and declines due to overexploitation leading to strict management of  
442 most beds across the UK (Woolmer, 2013). In addition, variance in reproductive success is  
443 known to occur in bivalves (Hedgecock & Pudovkin, 2011). These events could be responsible  
444 for the loss of genetic diversity, as already observed in several marine organisms (Pinsky &  
445 Palumbi, 2014). On the other hand, heterozygote deficiency (as indicated by positive  $F_{IS}$  in  
446 all sampling locations - Table 1) is well known to occur in marine bivalves (Gaffney, 1994),

447 and has already been detected in these populations of common cockles using microsatellites  
448 (Coscia et al. 2013). Furthermore, cockles have been shown to undergo boom and bust years  
449 (Morgan, O' Riordan, & Culloty, 2013) with the dispersal of cockle larvae and recruitment  
450 altering between years and with external parameters such as temperature (Miller, Versace,  
451 Matthews, Montgomery, & Bowie, 2013; Morgan et al., 2013).

452         Given the fine spatial scale and the reproductive biology of the study organism  
453 (broadcast spawner with a long pelagic larval phase), a lack of, or weak population structure  
454 was expected. Previous studies in the same geographic area identified a lack of genetic  
455 structure in shellfish species using microsatellite markers (Coscia et al., 2013; Watson et al.,  
456 2016; McKeown et al., 2019). In this study, three main genetically distinct units were  
457 identified with the neutral marker set. The first group includes the north Wales populations of  
458 Red Wharf Bay and Dee Estuary, the second includes Bannow Bay and Flaxfort Strand on the  
459 south coast of Ireland and the Gann Estuary in the south-west of Wales, and the final group  
460 contains only the Burry Inlet on the south coast of Wales. To our knowledge, this is the first  
461 time such a pattern has been detected in *C. edule*, or in any other shellfish resource in the Irish  
462 Sea.

463         Geographic proximity certainly favours gene flow, but oceanographic currents aiding  
464 larval transport are also major drivers of population structure (Barbut et al., 2019). For  
465 example, Red Wharf Bay and the Dee Estuary appear to be genetically homogeneous, due to  
466 high levels of gene flow, but these populations are very distinct from those further south (150-  
467 350 km away). This concurs with the model's prediction that prevailing currents will mostly  
468 disperse larvae from the north coast of Wales northwards. The high levels of gene flow  
469 detected between the Gann Estuary on Wales' southwest coast and sites on the southeast coast  
470 of Ireland also correspond with the model's prediction of high levels of westward dispersal  
471 along the Celtic Sea front (Coscia et al. 2013).

472 Of particular interest is the genetic make-up of the population in the Burry Inlet. Here,  
473 cockles have experienced recurrent mass mortality events for 15 years  
474 (<https://marinescience.blog.gov.uk/2015/08/14/unusual-cockle-mortalities-burry-inlet/>). The  
475 relatively high level of genetic differentiation between the neighbouring Burry Inlet and Gann  
476 estuary populations indicates that gene flow between these populations is low, seemingly  
477 contradicting the larval transport model's prediction of high connectivity. This result suggests  
478 that the Burry Inlet population may be able to persist through self-recruitment, rather than  
479 forming a sink population depending upon immigration from healthier populations elsewhere,  
480 and could explain the low genetic diversity and high levels of inbreeding detected there.  
481 However, the model showed that larval dispersal is possible from the Gann to Burry estuaries,  
482 although we assumed a relatively large settlement zone that extended beyond the mouth of the  
483 Burry Inlet (Fig. 6 Supplementary). Furthermore, it must be acknowledged that the Gann  
484 estuary cockle population is far smaller than that of the Burry Inlet so larvae dispersing from  
485 the Gann into the Burry may be swamped by self-recruitment, or might not survive due to  
486 local selection against them. Additionally, the southern coast of Wales contains other large  
487 cockle populations, such as the Three Rivers fishery mid-way between the Gann and Burry.  
488 These populations were not sampled/modelled in this study but may provide a nearer and  
489 greater source of larvae for the Burry Inlet than does the Gann Estuary.

490 The Spatial Environmental Association analysis identified several environmental  
491 factors highly associated with the population structure observed at neutral and outlier genetic  
492 markers. This is a strong statistical approach, which has already been successfully employed  
493 to study the influence of the environment on the genetic structure of commercially important  
494 bivalves, such as the eastern oyster (*Crassostrea virginica*; Bernatchez et al. 2019) and  
495 Atlantic deep-sea scallop (*Placopecten magellanicus*; Lehnert et al. 2019). In *C. edule*, neutral  
496 genetic structure is strongly dependent on geographic distance between sites (dbMEM-1),

497 indicating that isolation by distance plays an important role in shaping the observed genetic  
498 structure in this species, despite its long pelagic larval duration. Nevertheless, it is the interplay  
499 between isolation by distance, peak temperature-driven currents (July SBTD) and modelled  
500 connectivity (AEM2) that shapes neutral population structure. The summer stratification  
501 which strengthens the Celtic Sea front current, directed from south Wales to Ireland (Simpson  
502 and Hunter 1974), plays a major role in connecting cockle populations between the south of  
503 Wales and Ireland, while separating them from populations further north in the Irish Sea.  
504 Considering the 14 outlier loci, the minimum sea surface temperatures recorded in April and  
505 September explained the genetic variance observed within this dataset. In particular, the Burry  
506 Inlet was strongly associated with the SSTs in September, which are warmer compared to the  
507 ones recorded at other locations for the same time (Figure 1 Supplementary). If cockles in the  
508 Burry Inlet are indeed adapted to warmer sea surface temperatures than populations at sites  
509 further west or north (and especially compared to those at Gann), this may explain the  
510 maintenance of genetic differentiation between the Burry Inlet and the Gann Estuary despite  
511 their spatial proximity and the potential for high connectivity predicted by the model (Fig 3  
512 and Fig. 5 Supplementary Material). Larvae arriving adrift from Gann to the Burry may not  
513 be able to survive post-recruitment given selective pressure against them by higher  
514 temperatures.

515

#### 516 **4.2 Implications for management**

517 The results of the biophysical modelling are likely to have the greatest relevance to fishery  
518 management in terms of the potential seasonal variability in larval supply to cockle grounds.  
519 This study demonstrates the existence of three distinct units of cockles using both genomic  
520 tools and larval dispersal modelling. As with other recent studies (Lal, Southgate, Jerry,  
521 Bosserelle, & Zenger, 2017) these findings have important implications for fishery

522 management (Coscia et al. 2013; Miller et al. 2013) and how fisheries management can be  
523 reconciled with conservation and other activities.

524         Given the incidence of recurrent mass mortality events at the Burry Inlet (Callaway et  
525 al. 2013), the genetic isolation of this cockle fishery implied by the results of this study should  
526 be investigated further. This could be achieved by expanding the sampling coverage of the  
527 Burry Inlet to multiple sites and years and assessing its connectivity to other nearby cockle  
528 beds that have not been included in this study. Future investigations should be aimed at  
529 clarifying the role of local adaptation into the fine-scale population dynamics of the common  
530 cockle in this area, in order to improve management, while also assessing the role played by  
531 diseases and infections. The results from this study highlight the importance of the use of  
532 genomic and hydrodynamic data in assessing population structure and connectivity in an  
533 exploited and commercially important marine species and may aid in current and long-term  
534 management regimes of this species (Lal et al. 2016; Bernatchez et al. 2017).

535

#### 536 **Data availability**

537 The data that support the findings of this study are openly available in Dryad at  
538 [http://doi.org/\[doi\]](http://doi.org/[doi]), reference number [reference number].

539

#### 540 **Acknowledgements**

541 The genomic data was generated thanks to an internal grant awarded to IC by Aberystwyth  
542 University. The authors also wish to acknowledge the support of the Interreg Ireland-Wales  
543 Programme ISPP (<http://ispp.bangor.ac.uk/>) and Bluefish ([bluefishproject.com](http://bluefishproject.com)) projects, the  
544 Interreg Atlantic Area Programme Cockles project (<https://cockles-project.eu/>), and the  
545 SUSFISH project. Oceanographic data was provided through the SEACAMS project  
546 ([www.seacams.ac.uk](http://www.seacams.ac.uk)), funded by the Welsh Government, the Higher Education Funding

547 Council for Wales, the Welsh European Funding Office, and the European Regional  
548 Development Fund Convergence Programme. The model simulations were conducted on the  
549 Supercomputing-Wales high performance computing([www.supercomputing.wales](http://www.supercomputing.wales)) system (a  
550 collaboration between Welsh universities and the Welsh Government) , supported by Ade  
551 Fewings and Aaron Owen. The authors are grateful to all the people that have helped with  
552 sampling, Mandi Knott from the North Western Inshore Fisheries and Conservation Authority  
553 and Emer Morgan from University College Cork, as well as in the lab (Matt Hegarty and  
554 Elizabeth Harding), and the colleagues Niall McKeown and Hayley V. Watson for continuous  
555 help and support. We also are extremely grateful to Paulino Martinez for constructive  
556 comments on the manuscript.

557

558

## 559 **Bibliography**

560 Allendorf, F. W. (2017). Genetics and the conservation of natural populations: Allozymes to  
561 genomes. *Molecular Ecology*, 26(2), 420–430.

562 Araneda, C., Larraín, M. A., Hecht, B., & Narum, S. (2016). Adaptive genetic variation distinguishes  
563 Chilean blue mussels (*Mytilus chilensis*) from different marine environments. *Ecology and*  
564 *Evolution*, 6(11), 3632–3644.

565 Arnaud-Haond, S., Duarte, C. M., Alberto, F., & Serrão, E. A. (2007). Standardizing methods to  
566 address clonality in population studies. *Molecular Ecology*, 16(24), 5115–5139.

567 Baird, N. A., Etter, P. D., Atwood, T. S., Currey, M. C., Shiver, A. L., Lewis, Z. A., ... Johnson, E. A.  
568 (2008). Rapid SNP Discovery and Genetic Mapping Using Sequenced RAD Markers. *PLOS*  
569 *ONE*, 3(10), e3376.

570 Barbut, L., Crego, C. G., Delerue-Ricard, S., Vandamme, S., Volckaert, F. A. M., & Lacroix, G.  
571 (2019). How larval traits of six flatfish species impact connectivity. *Limnology and*  
572 *Oceanography*, 64(3), 1150–1171.

- 573 Beaumont, M. A., & Balding, D. J. (2004). Identifying adaptive genetic divergence among  
574 populations from genome scans. *Molecular Ecology*, *13*(4), 969–980.
- 575 Benestan, L., Gosselin, T., Perrier, C., Sainte-Marie, B., Rochette, R., & Bernatchez, L. (2015). RAD  
576 genotyping reveals fine-scale genetic structuring and provides powerful population  
577 assignment in a widely distributed marine species, the American lobster (*Homarus*  
578 *americanus*). *Molecular Ecology*, *24*(13), 3299–3315.
- 579 Benestan, L., Quinn, B. K., Maaroufi, H., Laporte, M., Clark, F. K., Greenwood, S. J., ... Bernatchez,  
580 L. (2016). Seascape genomics provides evidence for thermal adaptation and current-mediated  
581 population structure in American lobster (*Homarus americanus*). *Molecular Ecology*, *25*(20),  
582 5073–5092.
- 583 Bernatchez, L., Wellenreuther, M., Araneda, C., Ashton, D. T., Barth, J. M. I., Beacham, T. D., ...  
584 Withler, R. E. (2017). Harnessing the Power of Genomics to Secure the Future of Seafood.  
585 *Trends in Ecology & Evolution*, *32*(9), 665–680.
- 586 Bernatchez, S., Xuereb, A., Laporte, M., Benestan, L., Steeves, R., Laflamme, M., ... Bernatchez, L.  
587 (2019). Seascape genomics of eastern oyster (*Crassostrea virginica*) along the Atlantic coast  
588 of Canada. *Evolutionary Applications*, *12*.
- 589 Blanchet, F. G., Legendre, P., & Borcard, D. (2008). Modelling directional spatial processes in  
590 ecological data. *Ecological Modelling*, *215*(4), 325–336.
- 591 Blanchet, F. G., Legendre, P., Maranger, R., Monti, D., & Pepin, P. (2011). Modelling the effect of  
592 directional spatial ecological processes at different scales. *Oecologia*, *166*(2), 357–368.
- 593 Bode, M., Leis, J. M., Mason, L. B., Williamson, D. H., Harrison, H. B., Choukroun, S., & Jones, G.  
594 P. (2019). Successful validation of a larval dispersal model using genetic parentage data.  
595 *PLOS Biology*, *17*(7), e3000380.
- 596 Borcard, D., Gillet, F., & Legendre, P. (2011). *Numerical Ecology with R*. Springer.
- 597 Botsford, L. W., White, J. W., Coffroth, M.-A., Paris, C. B., Planes, S., Shearer, T. L., ... Jones, G. P.  
598 (2009). Connectivity and resilience of coral reef metapopulations in marine protected areas:  
599 Matching empirical efforts to predictive needs. *Coral Reefs*, *28*(2), 327–337.



- 600 Bullimore, B. (2014). Problems and pressures, management and measures in a site of marine  
601 conservation importance: Carmarthen Bay and Estuaries. *Estuarine, Coastal and Shelf*  
602 *Science*, 150, 288–298.
- 603 Burgess, S. D., Bowring, S., & Shen, S. (2014). High-precision timeline for Earth’s most severe  
604 extinction. *Proceedings of the National Academy of Sciences*, 111(9), 3316–3321.
- 605 Callaway, R., Burdon, D., Deasey, A., Mazik, K., & Elliott, M. (2013). The riddle of the sands: How  
606 population dynamics explains causes of high bivalve mortality. *Journal of Applied Ecology*,  
607 50(4), 1050–1059.
- 608 Chambers, J. M. (2013). SoDA: Functions and Examples for “Software for Data Analysis” (Version  
609 1.0-6).
- 610 Coscia, I., Vogiatzi, E., Kotoulas, G., Tsigenopoulos, C. S., & Mariani, S. (2012). Exploring neutral  
611 and adaptive processes in expanding populations of gilthead sea bream, *Sparus aurata* L., in  
612 the North-East Atlantic. *Heredity*, 108(5), 537–546.
- 613 Coscia, I., Robins, P., Porter, J., Malham, S., & Ironside, J. (2013). Modelled larval dispersal and  
614 measured gene flow: Seascape genetics of the common cockle *Cerastoderma edule* in the  
615 southern Irish Sea. *Conservation Genetics*, 14, 451.
- 616 Cowen, R. K., Gawarkiewicz, G., Pineda, J., Thorrold, S., & E. Werner, F. (2007). Population  
617 Connectivity in Marine Systems: An Overview. *Oceanography*, 20.
- 618 Cowen, R. K., & Sponaugle, S. (2009). Larval Dispersal and Marine Population Connectivity. *Annual*  
619 *Review of Marine Science*, 1(1), 443–466.
- 620 Dare, P., Bell, M. C., Walker, P. H., & Bannister, R. A. (2003). *Historical and current status of cockle*  
621 *and mussel stocks in The Wash*.
- 622 Dee, D. P., Uppala, S. M., Simmons, A. J., Berrisford, P., Poli, P., Kobayashi, S., ... Vitart, F. (2011).  
623 The ERA-Interim reanalysis: Configuration and performance of the data assimilation system.  
624 *Quarterly Journal of the Royal Meteorological Society*, 137(656), 553–597.
- 625 Dray, S., Péliissier, R., Couteron, P., Fortin, M.-J., Legendre, P., Peres-Neto, P. R., ... Wagner, H. H.  
626 (2012). Community ecology in the age of multivariate multiscale spatial analysis. *Ecological*  
627 *Monographs*, 82(3), 257–275.

- 628 Dray, Stéphane, Bauman, D., Blanchet, G., Borcard, D., Clappe, S., Guenard, G., ... Wagner, H. H.  
629 (2019). *adespatial: Multivariate Multiscale Spatial Analysis (Version 0.3-7)*.
- 630 Dray, Stéphane, Legendre, P., & Peres-Neto, P. R. (2006). Spatial modelling: A comprehensive  
631 framework for principal coordinate analysis of neighbour matrices (PCNM). *Ecological*  
632 *Modelling*, 196(3), 483–493.
- 633 Elliott, M., & Holden, J. (2017). *UK Sea Fisheries Statistics 2017* (p. 174). Marine Management  
634 Organisation.
- 635 Etter, P. D., Preston, J. L., Bassham, S., Cresko, W. A., & Johnson, E. A. (2011). Local De Novo  
636 Assembly of RAD Paired-End Contigs Using Short Sequencing Reads. *PLOS ONE*, 6(4),  
637 e18561.
- 638 Fermer, J., Culloty, S. C., Kelly, T. C., & O’Riordan, R. M. (2011). Parasitological survey of the  
639 edible cockle *Cerastoderma edule* (Bivalvia) on the south coast of Ireland. *Journal of the*  
640 *Marine Biological Association of the United Kingdom*, 91(4), 923–928.
- 641 Flach, E. C., & de Bruin, W. (1994). Does the activity of cockles, *Cerastoderma edule* (L.) and  
642 lugworms, *Arenicola marina* L., make *Corophium volutator* Pallas more vulnerable to  
643 epibenthic predators: A case of interaction modification? *Journal of Experimental Marine*  
644 *Biology and Ecology*, 182(2), 265–285.
- 645 Foll, M., & Gaggiotti, O. (2008). A Genome-Scan Method to Identify Selected Loci Appropriate for  
646 Both Dominant and Codominant Markers: A Bayesian Perspective. *Genetics*, 180(2), 977–  
647 993.
- 648 Gaffney, PM. (1994). Heterosis and heterozygote deficiencies in marine bivalves: More light? In  
649 *Genetics and Evolution of Aquatic Organisms*. Chapman & Hall.
- 650 Gimenez, L. (2019). Incorporating the geometry of dispersal and migration to understand spatial  
651 patterns of species distributions. *Ecography*, 42(4), 643–657.
- 652 Gormley, K., Mackenzie, C., Robins, P., Coscia, I., Cassidy, A., James, J., ... Porter, J. (2015).  
653 Connectivity and Dispersal Patterns of Protected Biogenic Reefs: Implications for the  
654 Conservation of *Modiolus modiolus* (L.) in the Irish Sea. *PLOS ONE*, 10(12), e0143337.
- 655 Gosselin, T. (2019). *assigner: Assignment Analysis with GBS/RAD Data using R (Version 0.5.6)*.

- 656 Goudet, J. (2005). Hierfstat, a package for r to compute and test hierarchical F-statistics. *Molecular*  
657 *Ecology Notes*, 5(1), 184–186.
- 658 Goudet, Jerome, & Jombart, T. (2015). hierfstat: Estimation and Tests of Hierarchical F-Statistics  
659 (Version 0.04-22).
- 660 Graham, J. A., O’Dea, E., Holt, J., Polton, J., Hewitt, H. T., Furner, R., ... Mayorga Adame, C. G.  
661 (2018). AMM15: A new high-resolution NEMO configuration for operational simulation of  
662 the European north-west shelf. *Geoscientific Model Development*, 11(2), 681–696.
- 663 Hartnett, M., Berry, A., Tully, O., & Dabrowski, T. (2007). Investigations into the transport and  
664 pathways of scallop larvae—the use of numerical models for managing fish stocks. *Journal of*  
665 *Environmental Monitoring*, 9(5), 403–410.
- 666 Hedgecock, D., & Pudovkin, A. I. (2011). Sweepstakes Reproductive Success in Highly Fecund  
667 Marine Fish and Shellfish: A Review and Commentary. *Bulletin of Marine Science*, 87(4),  
668 971–1002.
- 669 Hervas, A., Tully, O., Hickey, J., O’Keeffe, E., & Kelly, E. (2007). Assessment, Monitoring and  
670 Management of the Dundalk Bay and Waterford Estuary Cockle (*Cerastoderma edule*)  
671 *Fisheries in 2007* (p. 44).
- 672 Hickin, V. (2019). *Fisheries and Nature Conservation Issues of the Cockle Fishery in the Welsh*  
673 *District of the North Western and North Wales Sea Fisheries Committee*.
- 674 Horsburgh, K. J., Hill, A. E., & Brown, J. (1998). A summer jet in the St George’s Channel of the  
675 Irish Sea. *Estuarine, Coastal and Shelf Science*, 47(3), 285–294.
- 676 ICES. (2018). *Interim Report of the Working Group on the Application of Genetics in Fisheries and*  
677 *Aquaculture (WGAGFA)* (p. 41).
- 678 Jombart, T. (2008). adegenet: A R package for the multivariate analysis of genetic markers.  
679 *Bioinformatics*, 24(11), 1403–1405.
- 680 Jombart, T., & Ahmed, I. (2011). adegenet 1.3-1: New tools for the analysis of genome-wide SNP  
681 data. *Bioinformatics*, 27(21), 3070–3071.
- 682 Jombart, T., Kamvar, Z. N., Collins, C., Lustrik, R., Beugin, M.-P., Knaus, B. J., ... Ewing, R. J.  
683 (2018). adegenet: exploratory analysis of genetic and genomic data (Version 2.1.1).

- 684 Kamvar, Z. N., Brooks, J. C., & Grünwald, N. J. (2015). Novel R tools for analysis of genome-wide  
685 population genetic data with emphasis on clonality. *Frontiers in Genetics*, 6.
- 686 Kamvar, Z. N., Tabima, J. F., Everhart, S. E., Brooks, J. C., Krueger-Hadfield, S. A., Sotka, E., ...  
687 Grünwald, N. J. (2019). poppr: genetic analysis of populations with mixed reproduction  
688 (Version 2.8.3). R
- 689 Kamvar, Z. N., Tabima, J. F., & Grünwald, N. J. (2014). Poppr: An R package for genetic analysis of  
690 populations with clonal, partially clonal, and/or sexual reproduction. *PeerJ*, 2, e281.
- 691 Lal, M., C. Southgate, P., Jerry, D., Bosserelle, C., & Zenger, K. (2017). Swept away: Ocean currents  
692 and seascape features influence genetic structure across the 18,000 Km Indo-Pacific  
693 distribution of a marine invertebrate, the black-lip pearl oyster *Pinctada margaritifera*. *BMC*  
694 *Genomics*, 18.
- 695 Legendre, P., & Gallagher, E. D. (2001). Ecologically meaningful transformations for ordination of  
696 species data. *Oecologia*, 129(2), 271–280.
- 697 Lehnert, S. J., DiBacco, C., Wyngaarden, M. V., Jeffery, N. W., Lowen, J. B., Sylvester, E. V. A., ...  
698 Bradbury, I. R. (2019). Fine-scale temperature-associated genetic structure between inshore  
699 and offshore populations of sea scallop (*Placopecten magellanicus*). *Heredity*, 122(1), 69.
- 700 Li, H., Handsaker, B., Wysoker, A., Fennell, T., Ruan, J., Homer, N., ... Durbin, R. (2009). The  
701 Sequence Alignment/Map format and SAMtools. *Bioinformatics*, 25(16), 2078–2079.
- 702 Longshaw, M., & Malham, S. (2015). A review of the infectious agents, parasites, pathogens and  
703 commensals of European cockles (*Cerastoderma edule* and *C. glaucum*). *Journal of the*  
704 *Marine Biological Association of the United Kingdom*, 93, 227–247.
- 705 Malham, S., Hutchinson, T., & Longshaw, M. (2012). A review of the biology of European cockles  
706 (*Cerastoderma* spp.). *Journal of the Marine Biological Association of the United Kingdom*,  
707 92, 1563–1584.
- 708 Maroso, F., Hillen, J. E. J., Pardo, B. G., Gkagkavouzis, K., Coscia, I., Hermida, M., ... Ogden, R.  
709 (2018). Performance and precision of double digestion RAD (ddRAD) genotyping in large  
710 multiplexed datasets of marine fish species. *Marine Genomics*, 39, 64–72.

- 711 Martínez, L., Mendez, J., Insua, A., Arias-Pérez, A., & Freire, R. (2013). Genetic diversity and  
712 population differentiation in the cockle *Cerastoderma edule* estimated by microsatellite  
713 markers. *Helgoland Marine Research*, *67*, 179–189.
- 714 Martínez, Luisa, Freire, R., Arias-Pérez, A., Mendez, J., & Insua, A. (2015). Patterns of genetic  
715 variation across the distribution range of the cockle *Cerastoderma edule* inferred from  
716 microsatellites and mitochondrial DNA. *Marine Biology*, *162*(7), 1393–1406.
- 717 McKeown, N. J., Watson, H. V., Coscia, I., Wootton, E., & Ironside, J. E. (2019). Genetic variation in  
718 Irish Sea brown crab (*Cancer pagurus* L.): Implications for local and regional management.  
719 *Journal of the Marine Biological Association of the United Kingdom*, *99*(4), 879–886.
- 720 Miller, A. D., Versace, V. L., Matthews, T. G., Montgomery, S., & Bowie, K. C. (2013). Ocean  
721 currents influence the genetic structure of an intertidal mollusc in southeastern Australia –  
722 implications for predicting the movement of passive dispersers across a marine biogeographic  
723 barrier. *Ecology and Evolution*, *3*(5), 1248–1261.
- 724 Monzón-Argüello C., Dell’Amico F., Morinière P., Marco A., López-Jurado L. F., Hays Graeme C.,  
725 ... Lee Patricia L. M. (2012). Lost at sea: Genetic, oceanographic and meteorological  
726 evidence for storm-forced dispersal. *Journal of The Royal Society Interface*, *9*(73), 1725–  
727 1732.
- 728 Morgan, E., O’ Riordan, R. M., & Culloty, S. C. (2013). Climate change impacts on potential  
729 recruitment in an ecosystem engineer. *Ecology and Evolution*, *3*(3), 581–594.
- 730 Nielsen, E. E., Cariani, A., Aoidh, E. M., Maes, G. E., Milano, I., Ogden, R., ... Carvalho, G. R.  
731 (2012). Gene-associated markers provide tools for tackling illegal fishing and false eco-  
732 certification. *Nature Communications*, *3*, 851.
- 733 North, E., Schlag, Z., Hood, R., Li, M., Zhong, L., Gross, T., & Kennedy, V. (2008). Vertical  
734 swimming behavior influences the dispersal of simulated oyster larvae in a coupled particle-  
735 tracking and hydrodynamic model of Chesapeake Bay. *Marine Ecology Progress Series*, *359*,  
736 99–115.
- 737 Oksanen, F., Blanchet, F. G., Friendly, M., Kindt, R., Legendre, P., Mcglinn, D., .... (2017). vegan:  
738 Community Ecology Package. R package version 2.4-4.

- 739 Paris, C., K. Cowen, R., Claro, R., & C. Lindeman, K. (2005). Larval transport pathways from Cuban  
740 snapper (Lutjanidae) spawning aggregations based on biophysical modeling. *Marine Ecology-  
741 Progress Series* 296, 93–106.
- 742 Pingree, R. D., & Griffiths, D. K. (1979). Sand transport paths around the British Isles resulting from  
743 M2 and M4 tidal interactions. *Journal of the Marine Biological Association of the United  
744 Kingdom*, 59(2), 497–513.
- 745 Pinsky, M. L., & Palumbi, S. R. (2014). Meta-analysis reveals lower genetic diversity in overfished  
746 populations. *Molecular Ecology*, 23(1), 29–39.
- 747 R Core Team. (2019). *R: A Language and Environment for Statistical Computing*. [https://www.R-  
748 project.org/](https://www.R-project.org/)
- 749 Raj, A., Stephens, M., & Pritchard, J. K. (2014). fastSTRUCTURE: Variational Inference of  
750 Population Structure in Large SNP Data Sets. *Genetics*, 197(2), 573–589.
- 751 Razgour, O., Forester, B., Taggart, J. B., Bekaert, M., Juste, J., Ibáñez, C., ... Manel, S. (2019).  
752 Considering adaptive genetic variation in climate change vulnerability assessment reduces  
753 species range loss projections. *Proceedings of the National Academy of Sciences*, 116(21),  
754 10418–10423.
- 755 Robins, P. E., Neill, S. P., Giménez, L., Jenkins, S. R., & Malham, S. K. (2013). Physical and  
756 biological controls on larval dispersal and connectivity in a highly energetic shelf sea.  
757 *Limnology and Oceanography*, 58(2), 505–524.
- 758 Roesti, M., Salzburger, W., & Berner, D. (2012). Uninformative polymorphisms bias genome scans  
759 for signatures of selection. *BMC Evolutionary Biology*, 12(1), 94.
- 760 Rowley, A. F., Cross, M. E., Culloty, S. C., Lynch, S. A., Mackenzie, C. L., Morgan, E., ... Malham,  
761 S. K. (2014). The potential impact of climate change on the infectious diseases of  
762 commercially important shellfish populations in the Irish Sea—a review. *ICES Journal of  
763 Marine Science*, 71(4), 741–759.
- 764 Selkoe, K. A., D'Aloia, C. C., Crandall, E. D., Iacchei, M., Liggins, L., Puritz, J. B., ... Toonen, R. J.  
765 (2016). A decade of seascape genetics: Contributions to basic and applied marine  
766 connectivity. *Marine Ecology Progress Series*, 554, 1–19.



- 767 Simpson, J. H., & Hunter, J. R. (1974). Fronts in the Irish Sea. *Nature*, 250(5465), 404.
- 768 Stanev, E. V., Badewien, T. H., Freund, H., Grayek, S., Hahner, F., Meyerjürgens, J., ... Zielinski, O.  
769 (2019). Extreme westward surface drift in the North Sea: Public reports of stranded drifters  
770 and Lagrangian tracking. *Continental Shelf Research*, 177, 24–32.
- 771 Teacher, A. G., André, C., Jonsson, P. R., & Merilä, J. (2013). Oceanographic connectivity and  
772 environmental correlates of genetic structuring in Atlantic herring in the Baltic Sea.  
773 *Evolutionary Applications*, 6(3), 549–567.
- 774 Thieltges, D. W. (2006). Parasite-induced summer mortality in the cockle *Cerastoderma edule* by the  
775 trematode *Gymnophallus choledochus*. *Hydrobiologia*, 559(1), 455–461.
- 776 Truelove, N., J. Box, S., Aiken, K., Blythe-Mallett, A., Boman, E., J. Booker, C., ... Stoner, A.  
777 (2017). Isolation by oceanic distance and spatial genetic structure in an overharvested  
778 international fishery. *Diversity and Distributions*, 23(11), 1292-1300.
- 779 Viricel, A., & Rosel, P. E. (2014). Hierarchical population structure and habitat differences in a highly  
780 mobile marine species: the Atlantic spotted dolphin. *Molecular Ecology*, 23(20), 5018–5035.
- 781 Watson, H. V., McKeown, N. J., Coscia, I., Wootton, E., & Ironside, J. E. (2016). Population genetic  
782 structure of the European lobster (*Homarus gammarus*) in the Irish Sea and implications for  
783 the effectiveness of the first British marine protected area. *Fisheries Research*, 183, 287–293.
- 784 Weir, B. S., & Cockerham, C. C. (1984). Estimating F-Statistics for the Analysis of Population  
785 Structure. *Evolution*, 38(6), 1358–1370.
- 786 Wolff, W. J. (2005). The exploitation of living resources in the Dutch Wadden Sea: A historical  
787 overview. *Helgoland Marine Research*, 59(1), 31–38.
- 788 Woodings, L. N., Murphy, N. P., Doyle, S. R., Hall, N. E., Robinson, A. J., Liggins, G. W., ...  
789 Strugnell, J. M. (2018). Outlier SNPs detect weak regional structure against a background of  
790 genetic homogeneity in the Eastern Rock Lobster, *Sagmariasus verreauxi*. *Marine Biology*,  
791 165(12), 185.
- 792 Woolmer, A. (2013). *Review of National Cockle Mortality Issues and Options for Fishery*  
793 *Management in Kent and Essex IFCA* (p. 56). Retrieved from [https://www.kentandessex-](https://www.kentandessex-ifca.gov.uk/wp-content/uploads/2015/07/report-of-EU-and-UK-cockle-mortality.pdf)  
794 [ifca.gov.uk/wp-content/uploads/2015/07/report-of-EU-and-UK-cockle-mortality.pdf](https://www.kentandessex-ifca.gov.uk/wp-content/uploads/2015/07/report-of-EU-and-UK-cockle-mortality.pdf)

795 Van Wyngaarden, M., Snelgrove, P. V. R., DiBacco, C., Hamilton, L. C., Rodríguez-Ezpeleta, N.,  
796 Zhan, L., ... Bradbury, I. R. (2018). Oceanographic variation influences spatial genomic  
797 structure in the sea scallop, *Placopecten magellanicus*. *Ecology and Evolution*, 8(5), 2824–  
798 2841.

799 Xuereb, A., Benestan, L., Normandeau, E., MR Curtis, J., Bernatchez, L., & Fortin, M. (2018).  
800 Asymmetric oceanographic processes mediate connectivity and population genetic structure,  
801 as revealed by RADseq, in a highly dispersive marine invertebrate (*Parastichopus*  
802 *californicus*). *Molecular Ecology*, 27(10), 2347-2364.

803 Young, E. F., Belchier, M., Hauser, L., Horsburgh, G. J., Meredith, M. P., Murphy, E. J., ... Carvalho,  
804 G. R. (2015). Oceanography and life history predict contrasting genetic population structure  
805 in two Antarctic fish species. *Evolutionary Applications*, 8(5), 486–509.

806

807

808

809

810

811

812

813

814

815

816

817

818

819

820



821 **Tables and Figures**

822

823 **Table 1:** genetic diversity indices for the two datasets.  $N$ , number of individuals remaining

824 after filtering for each location;  $H_O$ , observed heterozygosity,  $H_E$ , expected heterozygosity

825 and  $F_{IS}$ , the inbreeding coefficient. Values that are significant (95% confidence interval) are

826 in bold.

|                 |     | neutral |       |       |              | outlier |       |              |
|-----------------|-----|---------|-------|-------|--------------|---------|-------|--------------|
|                 |     | $N$     | $H_O$ | $H_E$ | $F_{IS}$     | $H_O$   | $H_E$ | $F_{IS}$     |
| Bannow Bay      | BAN | 22      | 0.133 | 0.150 | <b>0.087</b> | 0.269   | 0.272 | 0.006        |
| Gann            | GAN | 17      | 0.129 | 0.147 | <b>0.094</b> | 0.246   | 0.240 | 0.032        |
| Dee             | DEE | 22      | 0.116 | 0.148 | <b>0.173</b> | 0.218   | 0.355 | <b>0.335</b> |
| Dyfi            | DYF | 11      | 0.103 | 0.149 | <b>0.238</b> | 0.146   | 0.234 | <b>0.394</b> |
| Flaxfort Strand | FLX | 13      | 0.103 | 0.156 | <b>0.275</b> | 0.197   | 0.266 | <b>0.201</b> |
| Red Wharf       | RWB | 18      | 0.118 | 0.144 | <b>0.141</b> | 0.286   | 0.337 | <b>0.179</b> |
| Burry Inlet     | BUR | 30      | 0.109 | 0.150 | <b>0.230</b> | 0.173   | 0.218 | 0.159        |

827

828

829

830

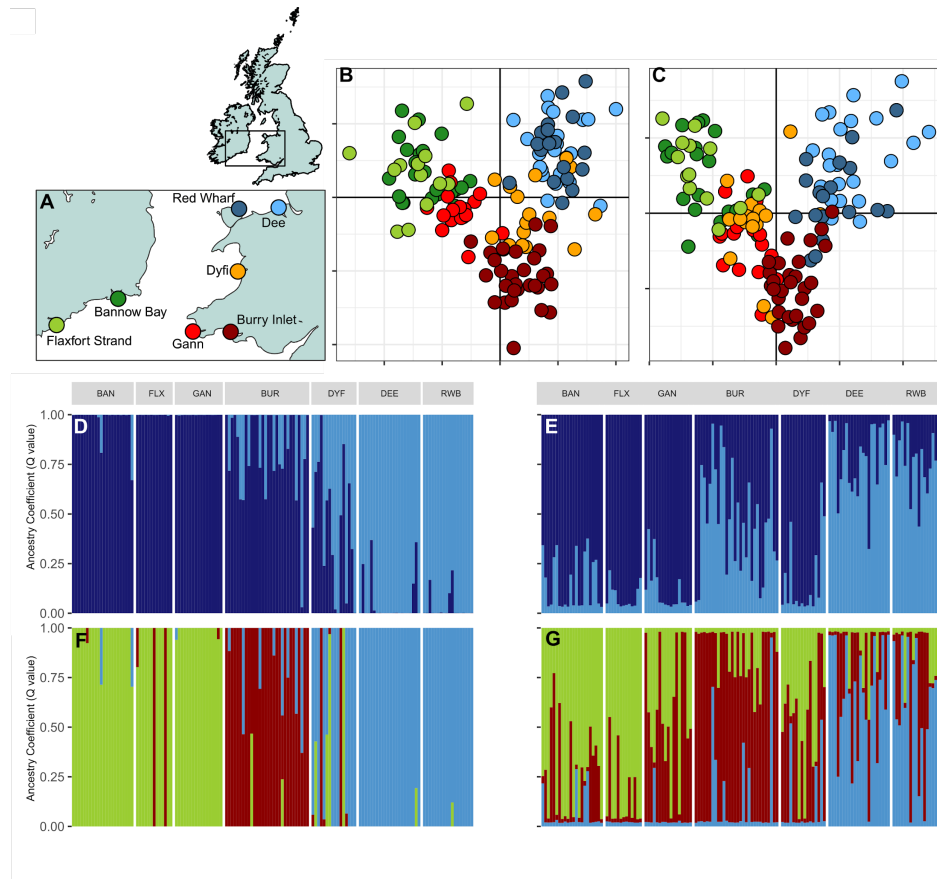

831

832 **Figure 1:** A) Sampling locations; B) DAPC analysis using the neutral dataset; C) DAPC  
833 analysis using the 14 outliers; below, the barplots generated by fastSTRUCTURE from the  
834 neutral (D and F) and outlier (E and G) datasets, for both  $K=2$  and  $K=3$ .

835

836

837

838

839

840

841

842

843

844

845

846

847

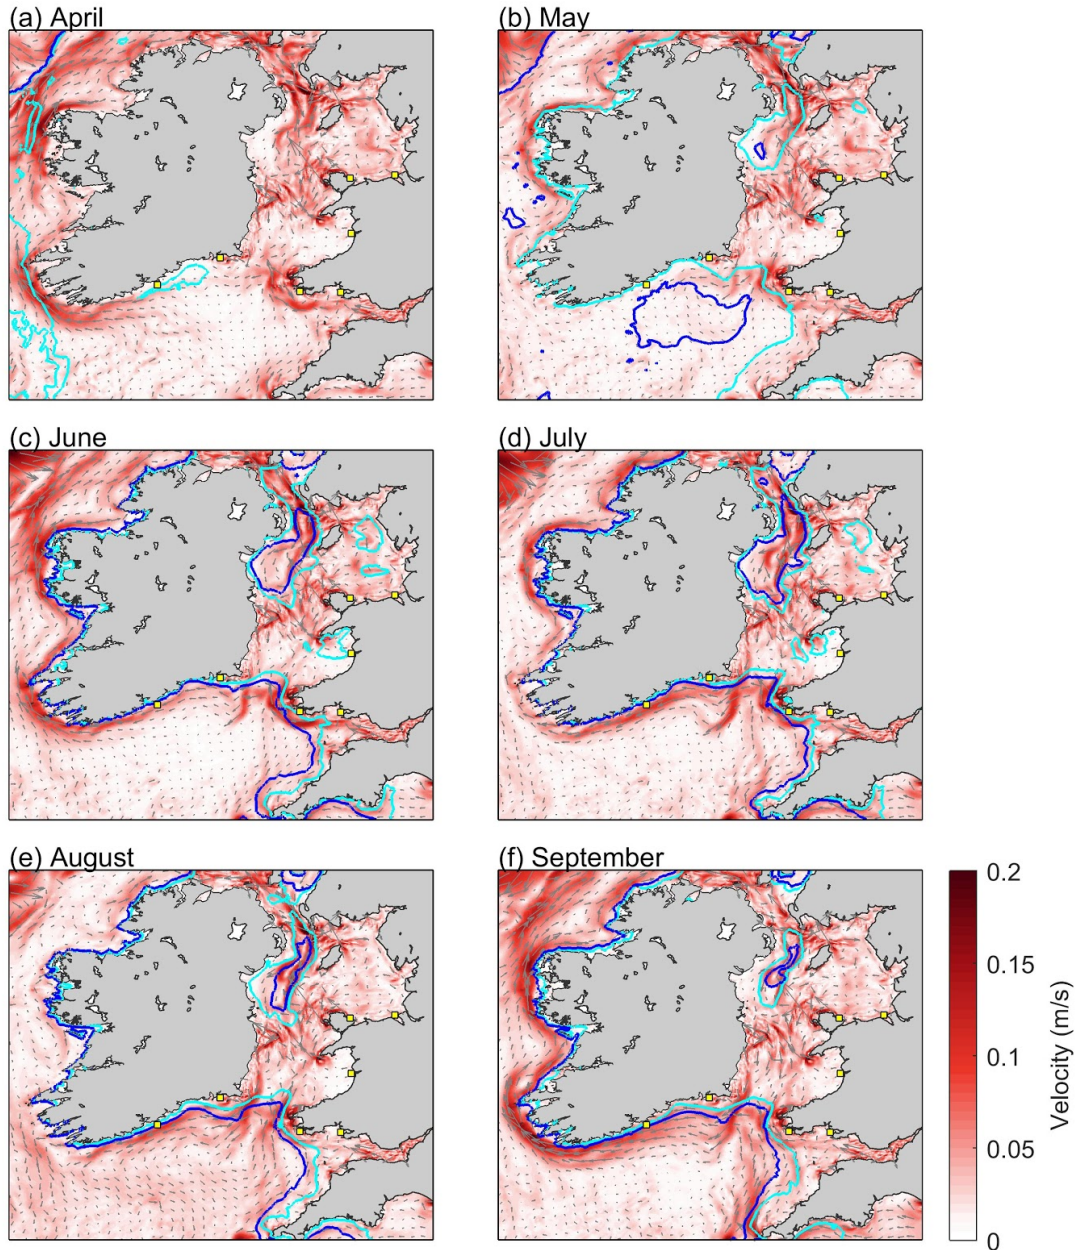

848

849 **Figure 2:** Simulated development of stratification and density-driven currents in the Irish and  
850 Celtic Seas, during April-September 2014 (a-f). Light and dark blue contours denote surface-  
851 bottom temperature differences of 1°C and 2.5°C, respectively. Each panel shows monthly-  
852 averaged and depth-averaged velocity magnitude (red shading) and direction (vectors).  
853 Sample locations are indicated with yellow squares.

854

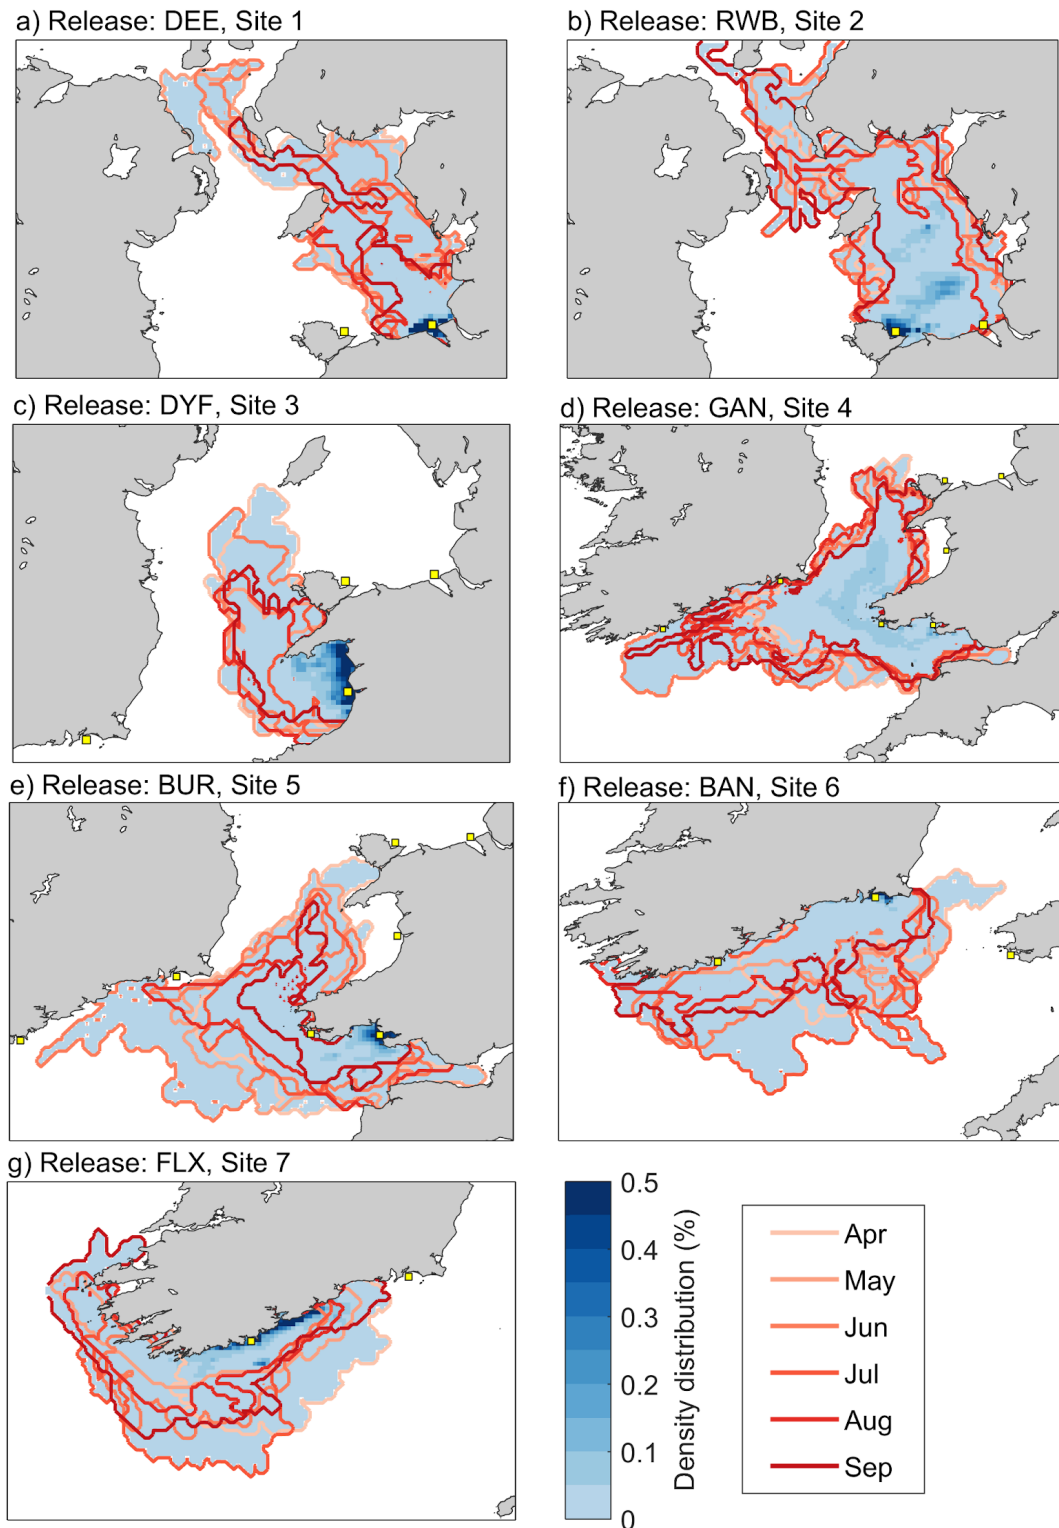

855

856 **Figure 3:** Probability density distribution maps showing simulated dispersal probability from  
857 release sites 1-7 (yellow squares). Each panel (blue colour scale in a-g) shows dispersal range  
858 for 11,520,000 particles (12,000 each month  $\times$  6 months  $\times$  10 settlement days). The

859 *superimposed contour lines show the maximum spread per month, hence an indication of*  
860 *seasonal dispersal variability.*

861

862

863

864

865

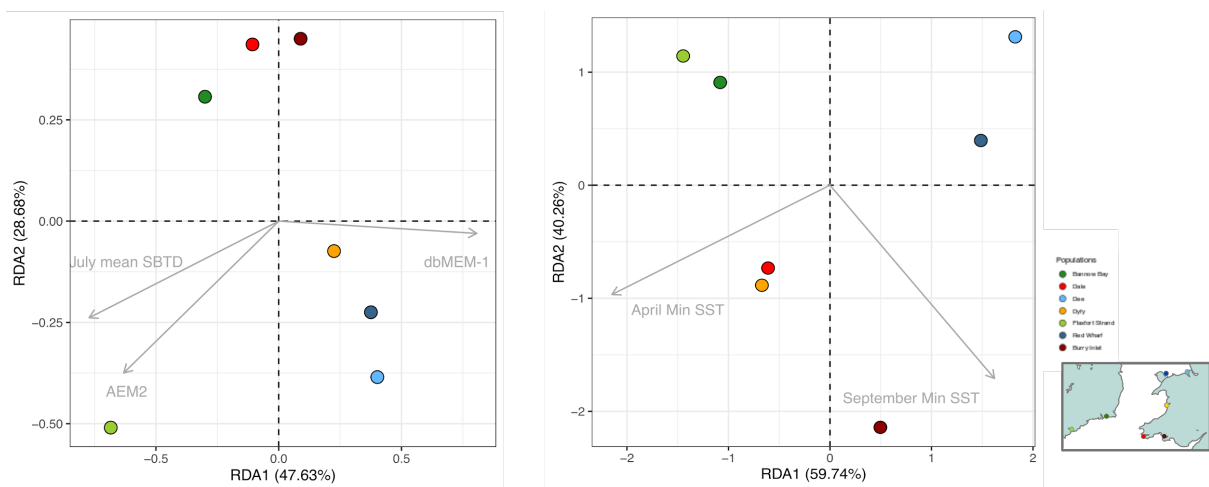

866

867 **Figure 4:** Redundancy analysis (parsimonious RDA) performed for the (A) neutral and (B)  
868 outlier datasets. Each circle is a sampling location, and each arrow is an environmental  
869 variable that significantly drives the observed population structure.

870

871

872

873

874

875

876

877

878 **SUPPLEMENTARY MATERIAL**

879 **Table 1 Supplementary** Filtering steps. *#individuals*, remaining number of individuals after

880 each filtering step; *#SNPs* remaining number of SNPs

881

|                               | <b># individuals</b> | <b># SNPs</b> |
|-------------------------------|----------------------|---------------|
| <b>Raw dataset</b>            | 191                  | 4271          |
| <b>Missing data</b>           | 159                  | 4271          |
| <b><i>F</i><sub>IS</sub></b>  | 138                  | 3488          |
| <b>MAF 1%</b>                 | 138                  | 1864          |
| <b>Linkage Disequilibrium</b> | 138                  | 1775          |
| <b>Hardy-Weinberg eq.</b>     | 138                  | 1725          |

882

883

884

885

886

887

888



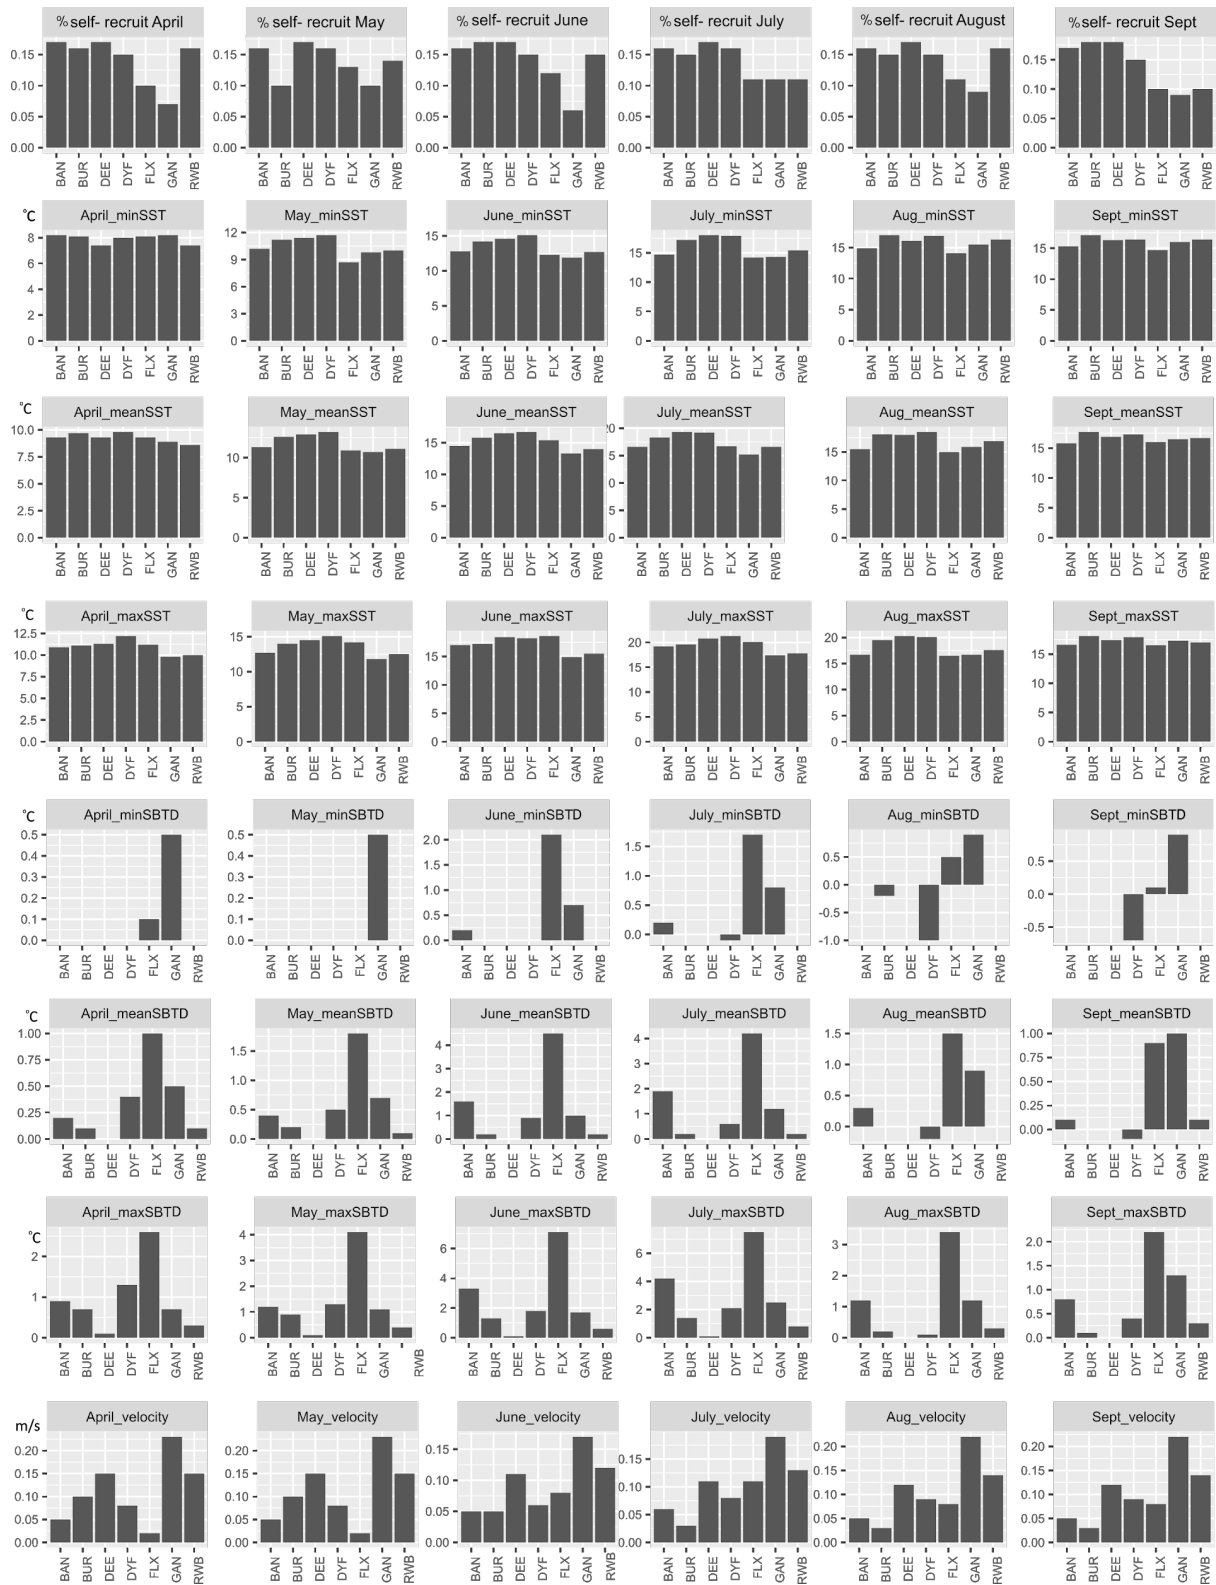

889

890 **Figure 1 Supplementary:** Environmental parameters for each location, and each month used

891 in the environmental association analysis.

892

893

894

895

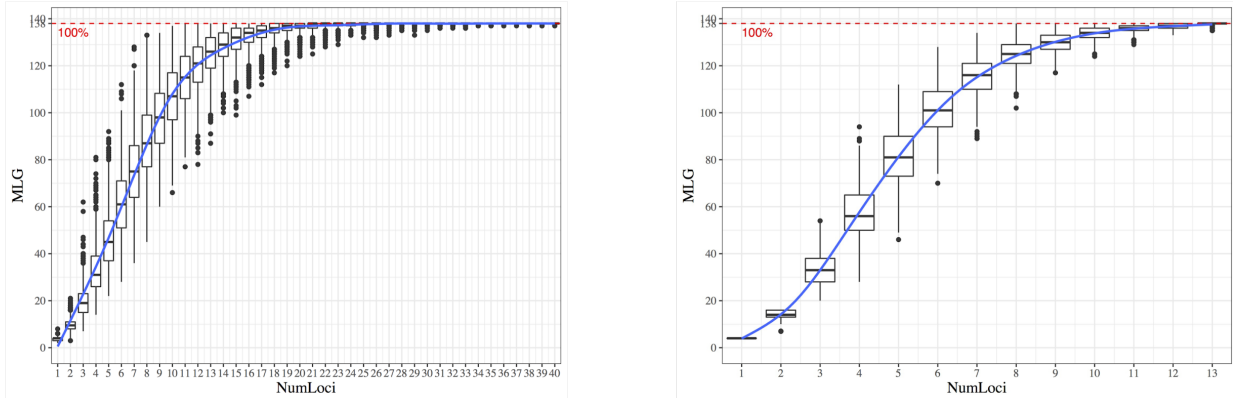

896

897 **Figure 2 Supplementary** Genotype accumulation curves for neutral (A) and outlier (B)  
 898 datasets. On the Y axis, the number of multilocus genotypes and on the X axis, the number of  
 899 loci.

900

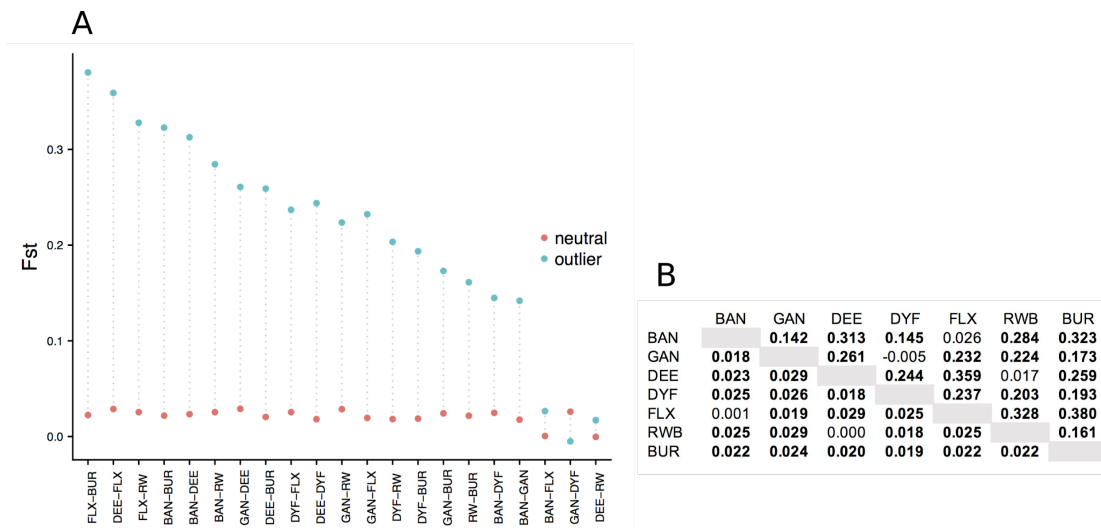

901

902 **Figure 3 Supplementary:** Pairwise  $F_{st}$  calculated for neutral and outlier datasets. The graph  
 903 (A) shows which pairs have the highest difference between the two. In the table (B) the relative  
 904 values for neutral (lower diagonal) and outliers (upper diagonal). In bold, values that are  
 905 significant (95% confidence interval).



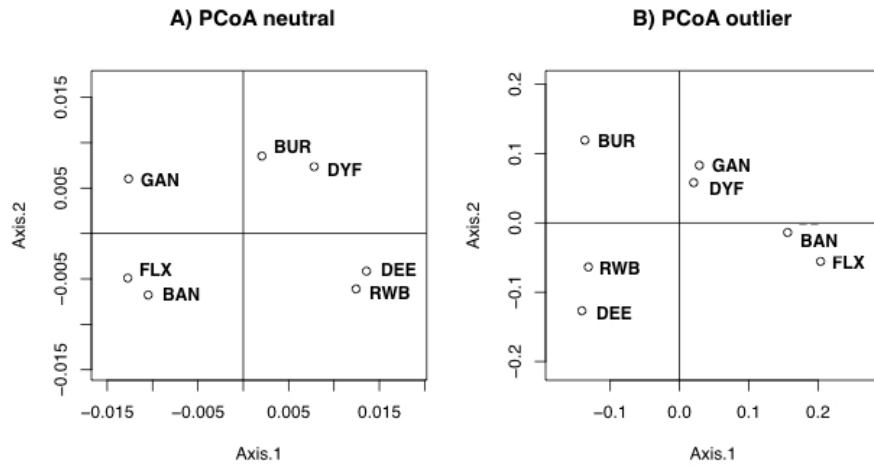

906

907 **Figure 4 Supplementary** Principal Coordinates Analysis (MDS plots) based on  $F_{ST}$

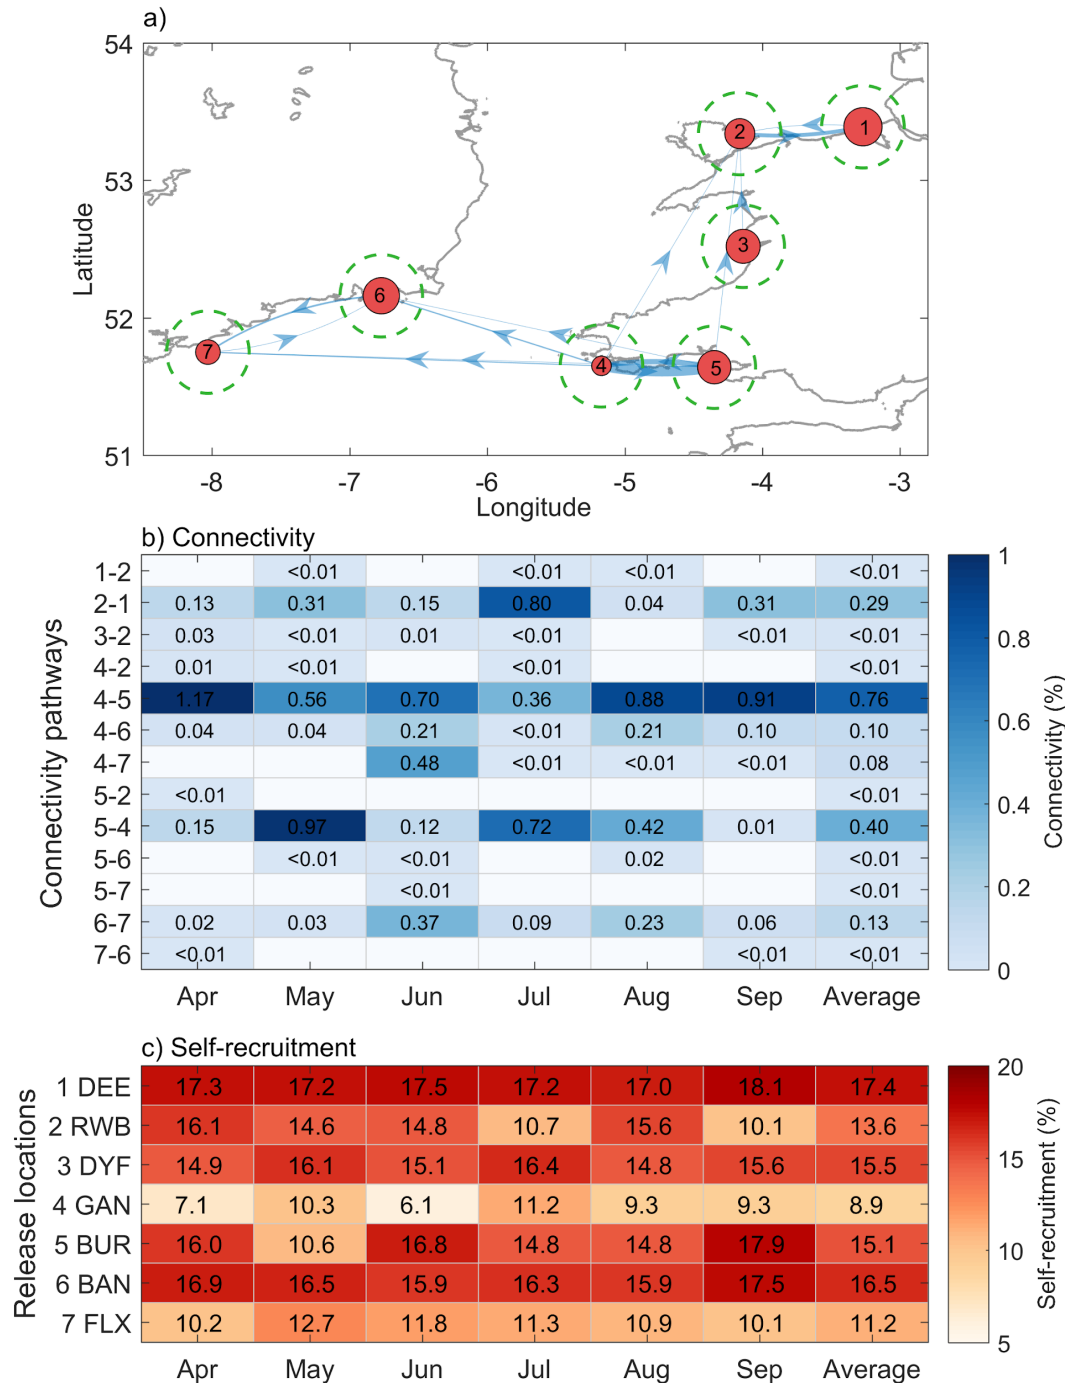

908

909 **Figure 5 Supplementary:** Simulated connectivity between the seven sampled cockle

910 populations. Seasonally-averaged (2014) connectivity networks are shown geographically in

911 (a). The thickness of the pathways in (a) corresponds to the average values in (b). Self-

912 recruitment in (a) is denoted by the size of the red circles which correspond to the average

913 values in (c). The dashed green circles show the settlement radius used to calculate

914 *connectivity. Seasonal variability (Apr.-Sep.) is shown for connectivity (b) and self-*  
915 *recruitment (c).*

916

917

918

919

920

921

922

923

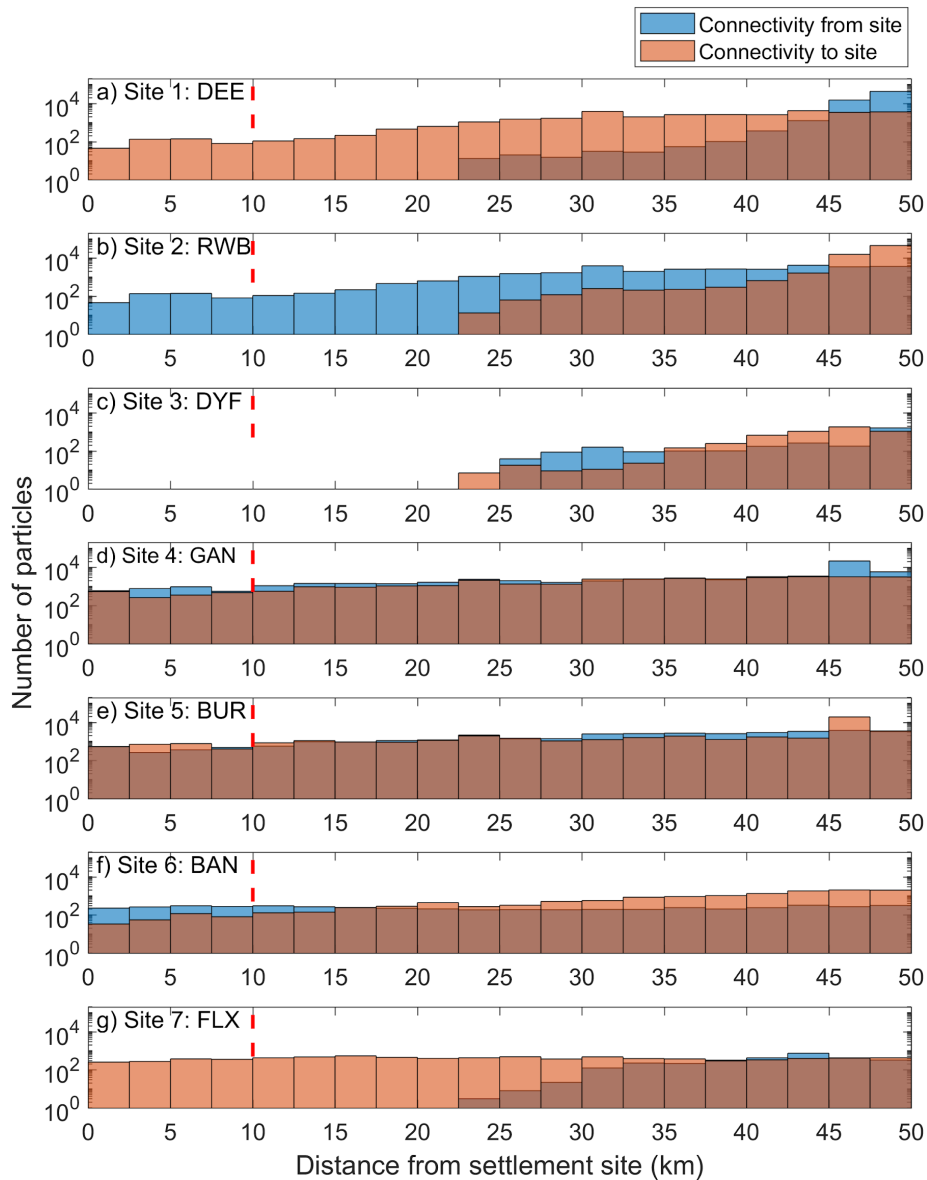

924

925 **Figure 6 Supplementary:** Histogram plots showing connectivity as a function of distance. For  
926 each particle trajectory, the minimum distance to a settlement site during days 30-40 is  
927 presented. Blue bars signify the connectivity potential of source sites 1-7 (a-g). Red bars  
928 signify the connectivity potential of settlement sites 1-7 (a-g). For example, (a) shows that  
929 particles released from DEE simulated no connectivity within 20 km of a settlement site,  
930 whereas particles from elsewhere did connect with DEE. The dashed red line denotes our  
931 threshold radius for connectivity: 10 km away from each settlement site.

932

933
